# Supplementary material for: Identifying Offspring Sex Ratio Skews in Zoological Facilities Using Large Historical Datasets
Source: MDPI journal article supplement (doi:10.3390/jzbg4040048), 2023-11-06

Time period 1 Dam Sex Ratios by Species (n < 25)

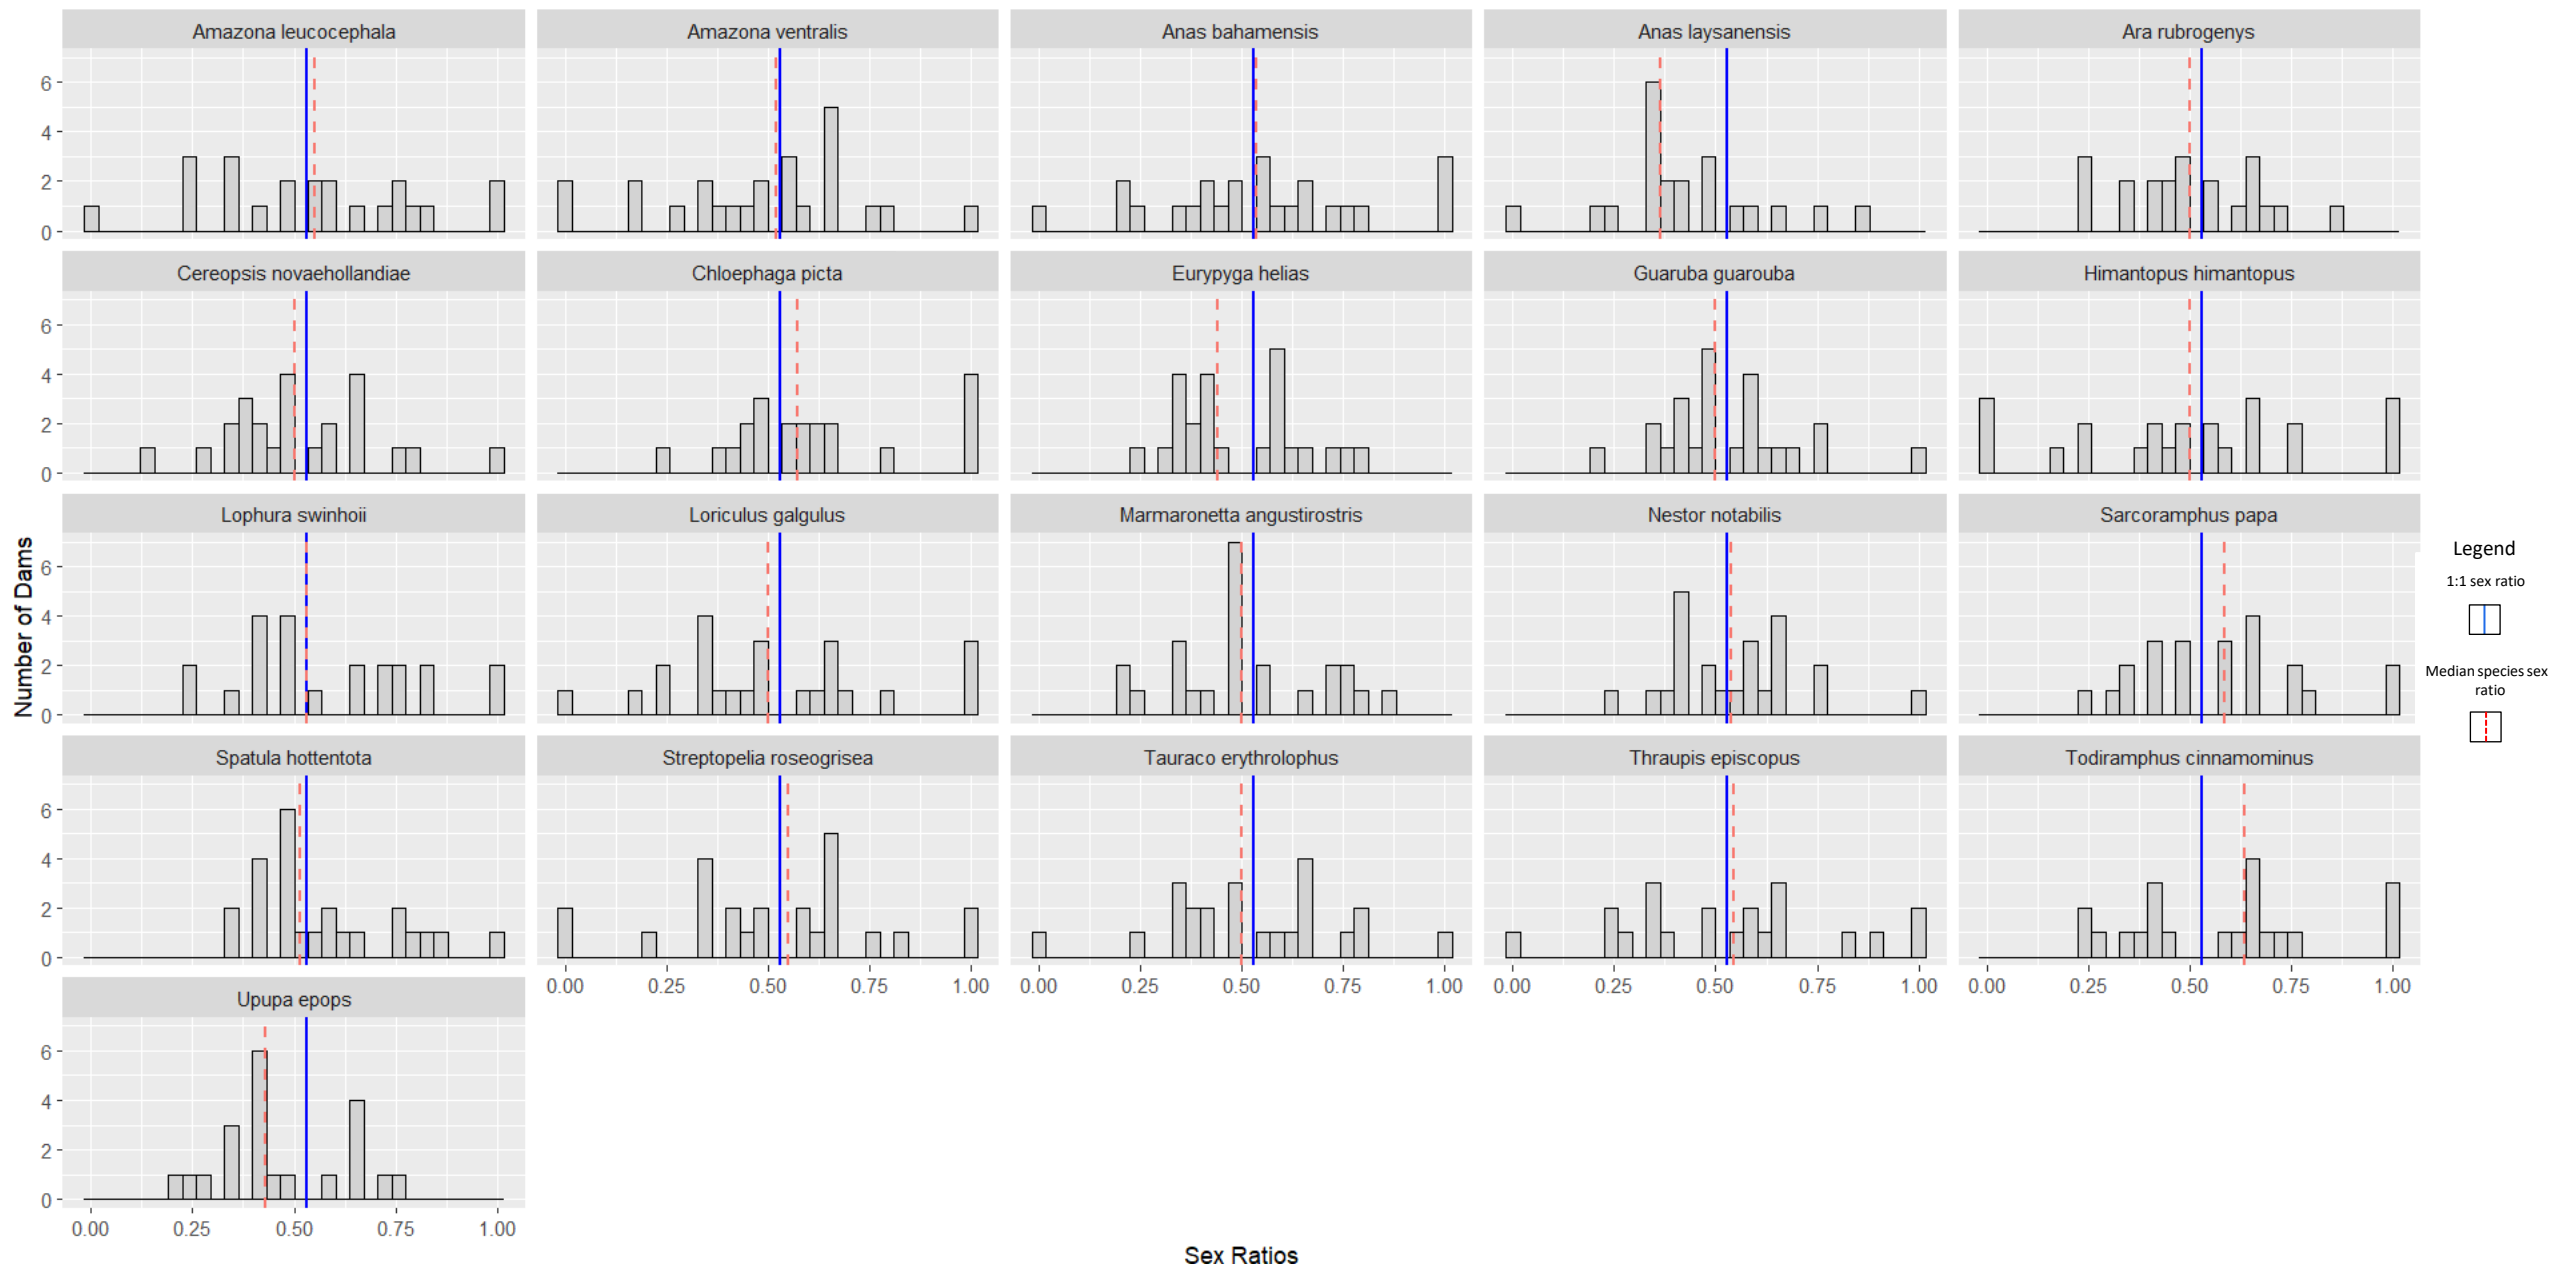

Time period 1 Dam Sex Ratios by Species (n = 25-29)

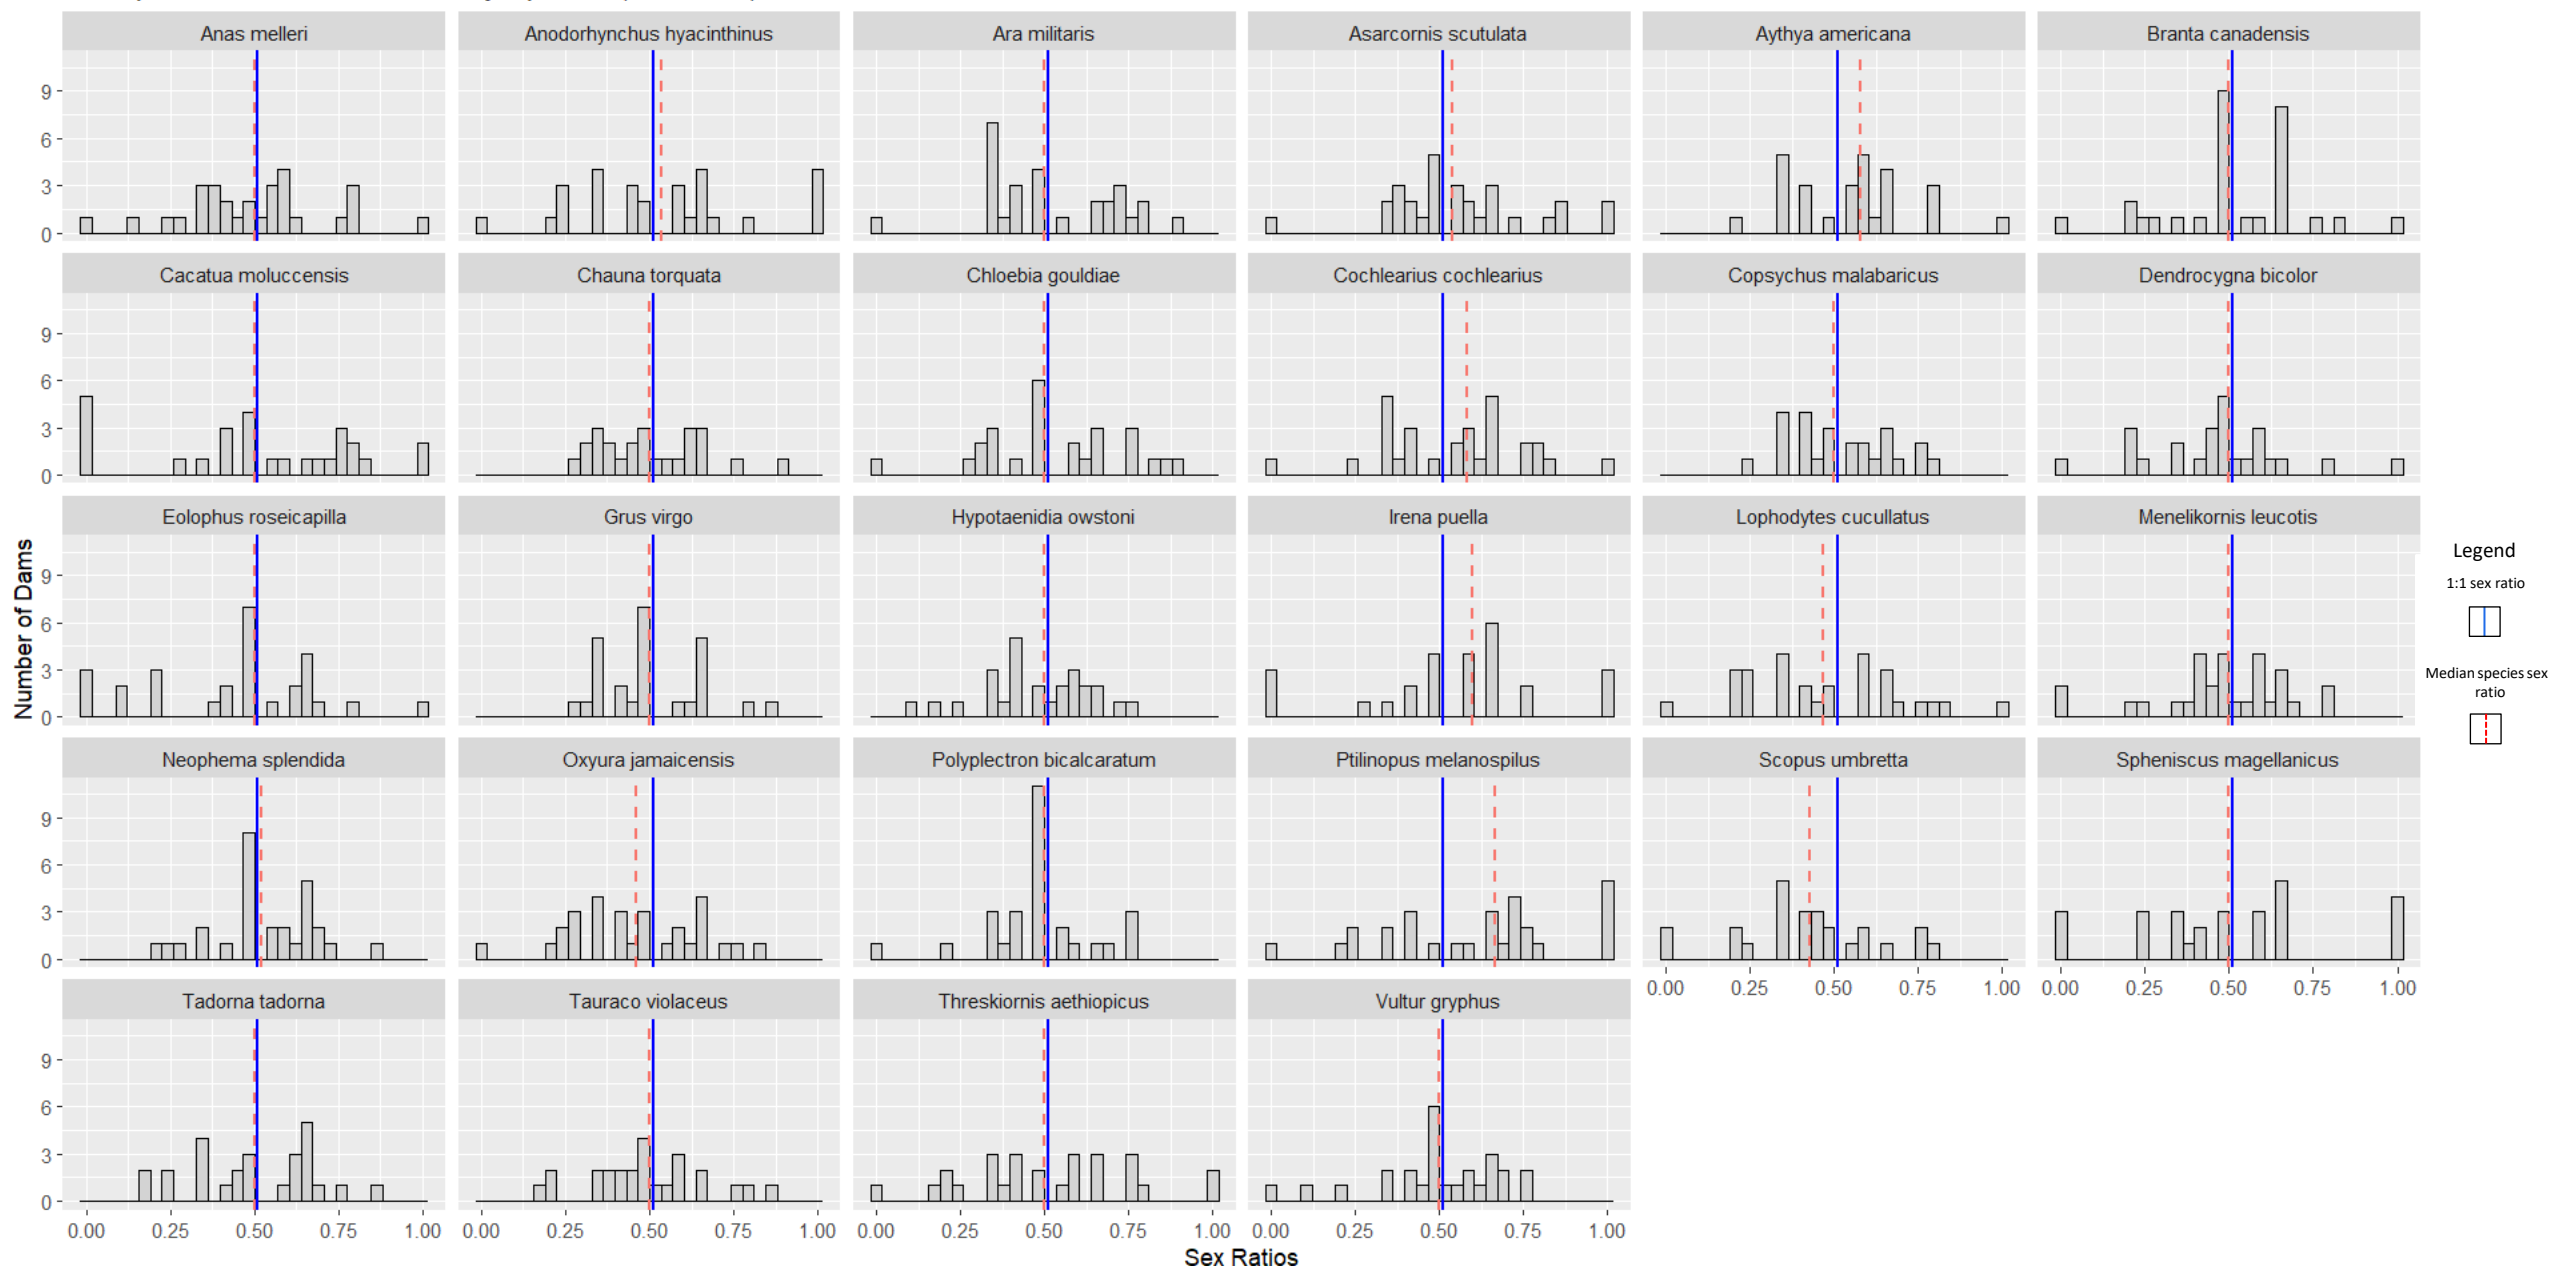

Time period 1 Dam Sex Ratios by Species (n = 30-37)

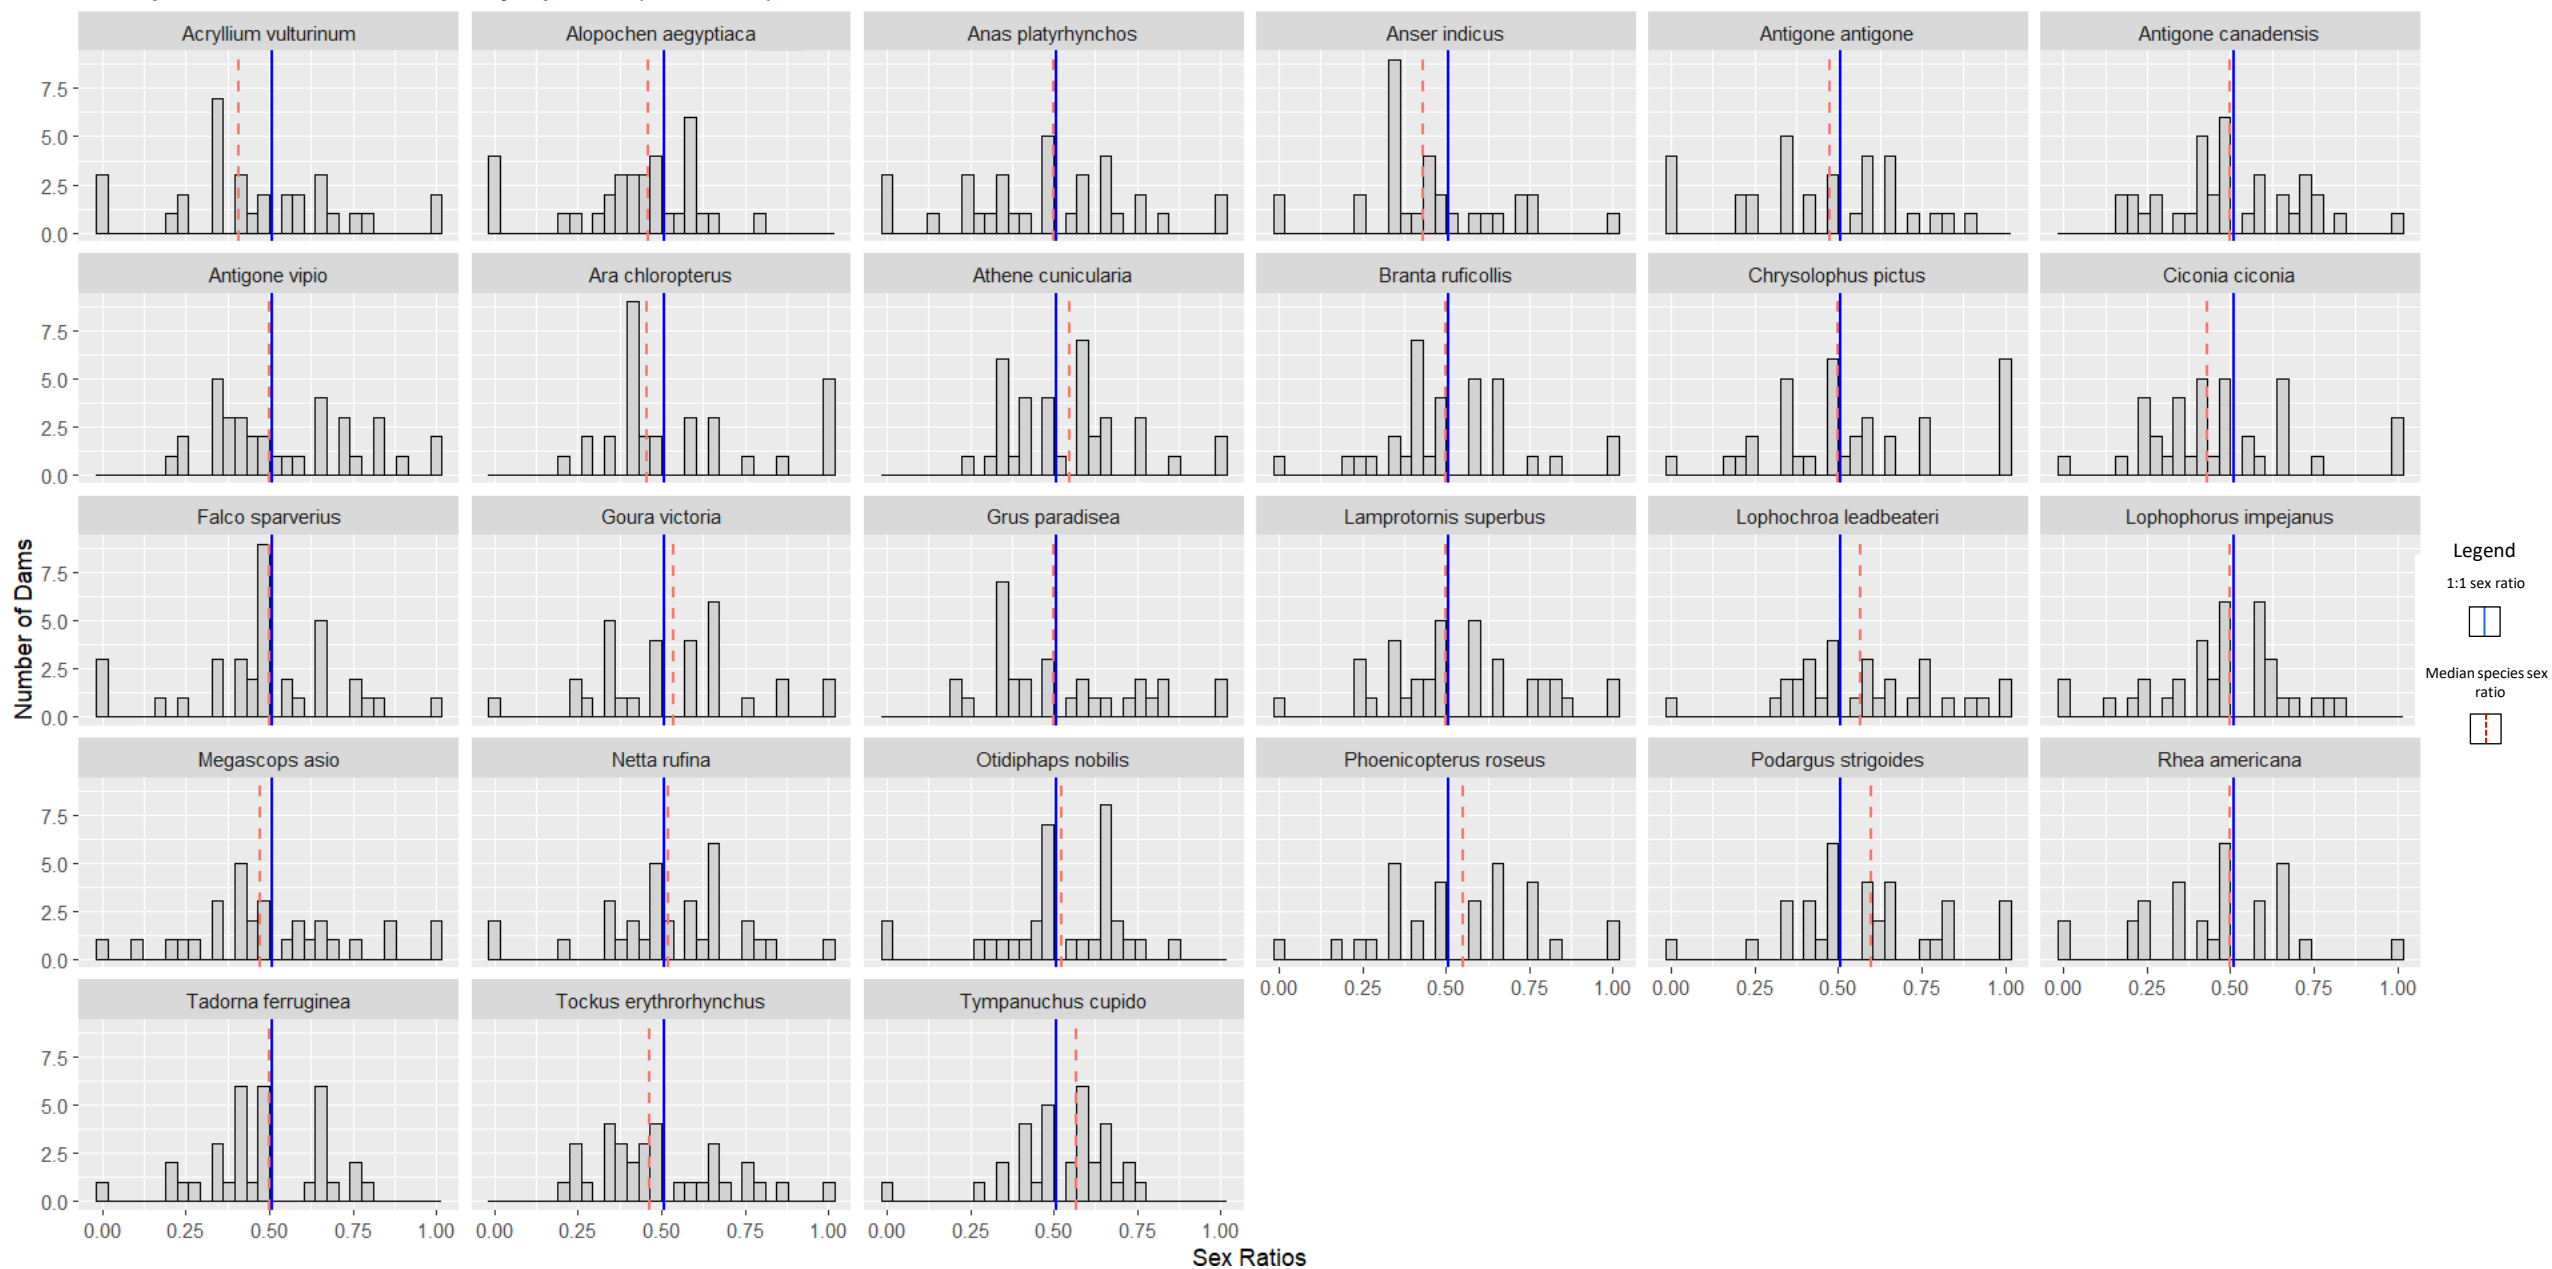

Time period 1 Dam Sex Ratios by Species (n = 38-59)

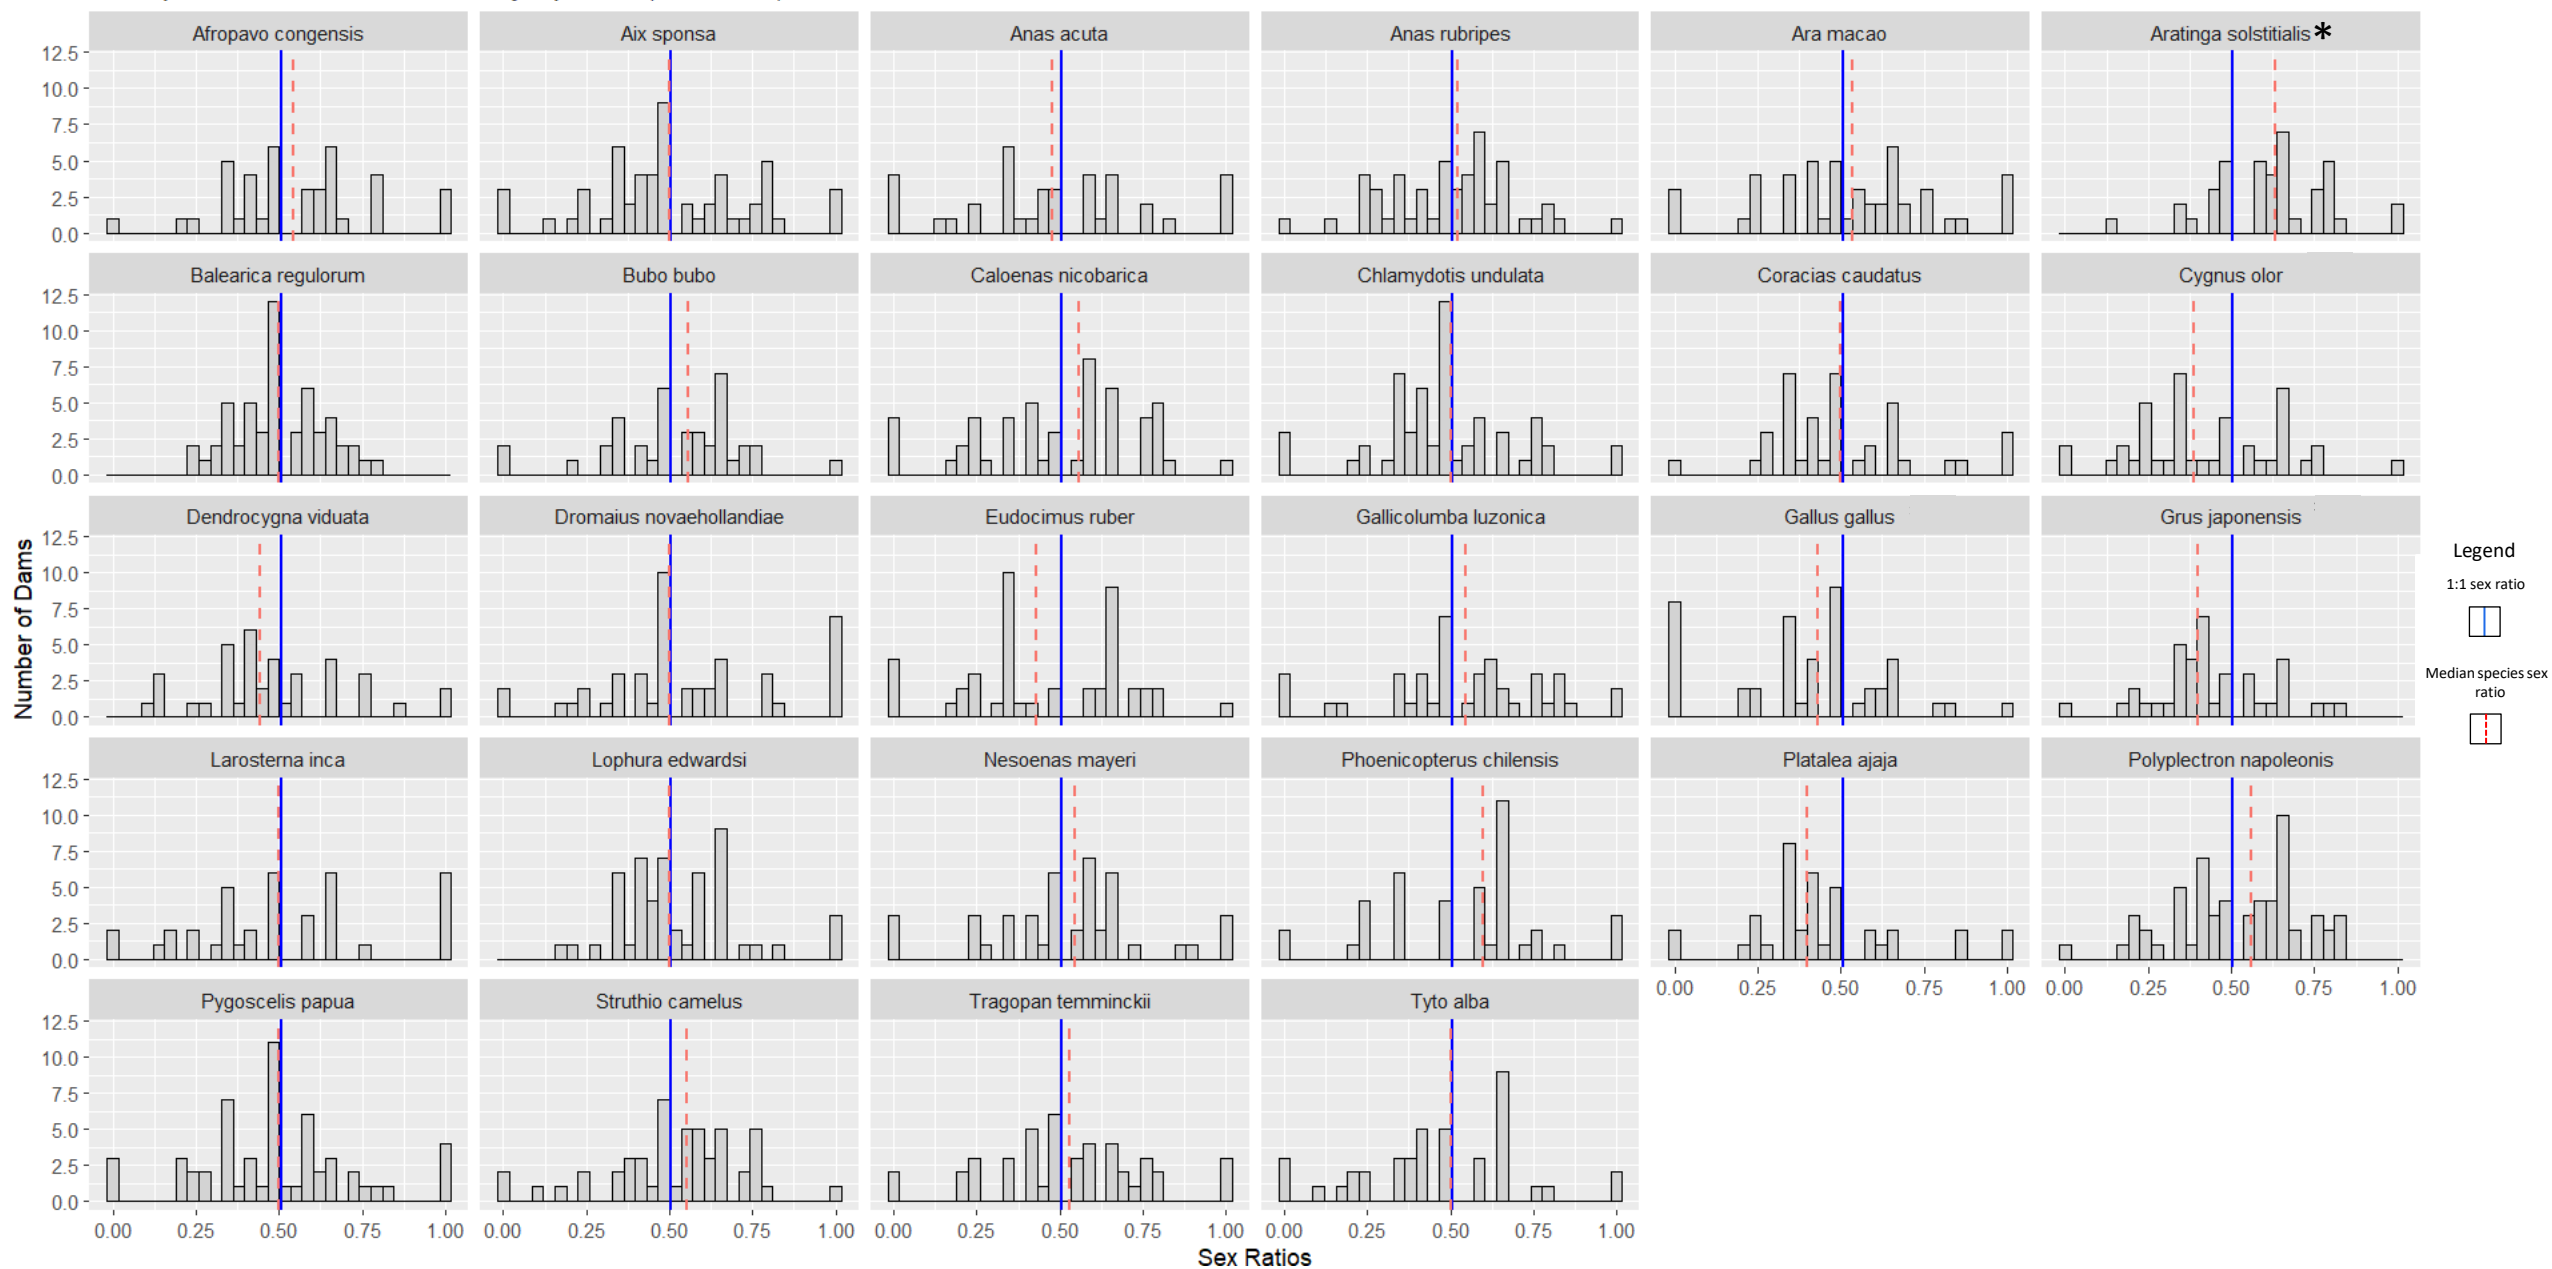

Time period 1 Dam Sex Ratios by Species (n > 60)

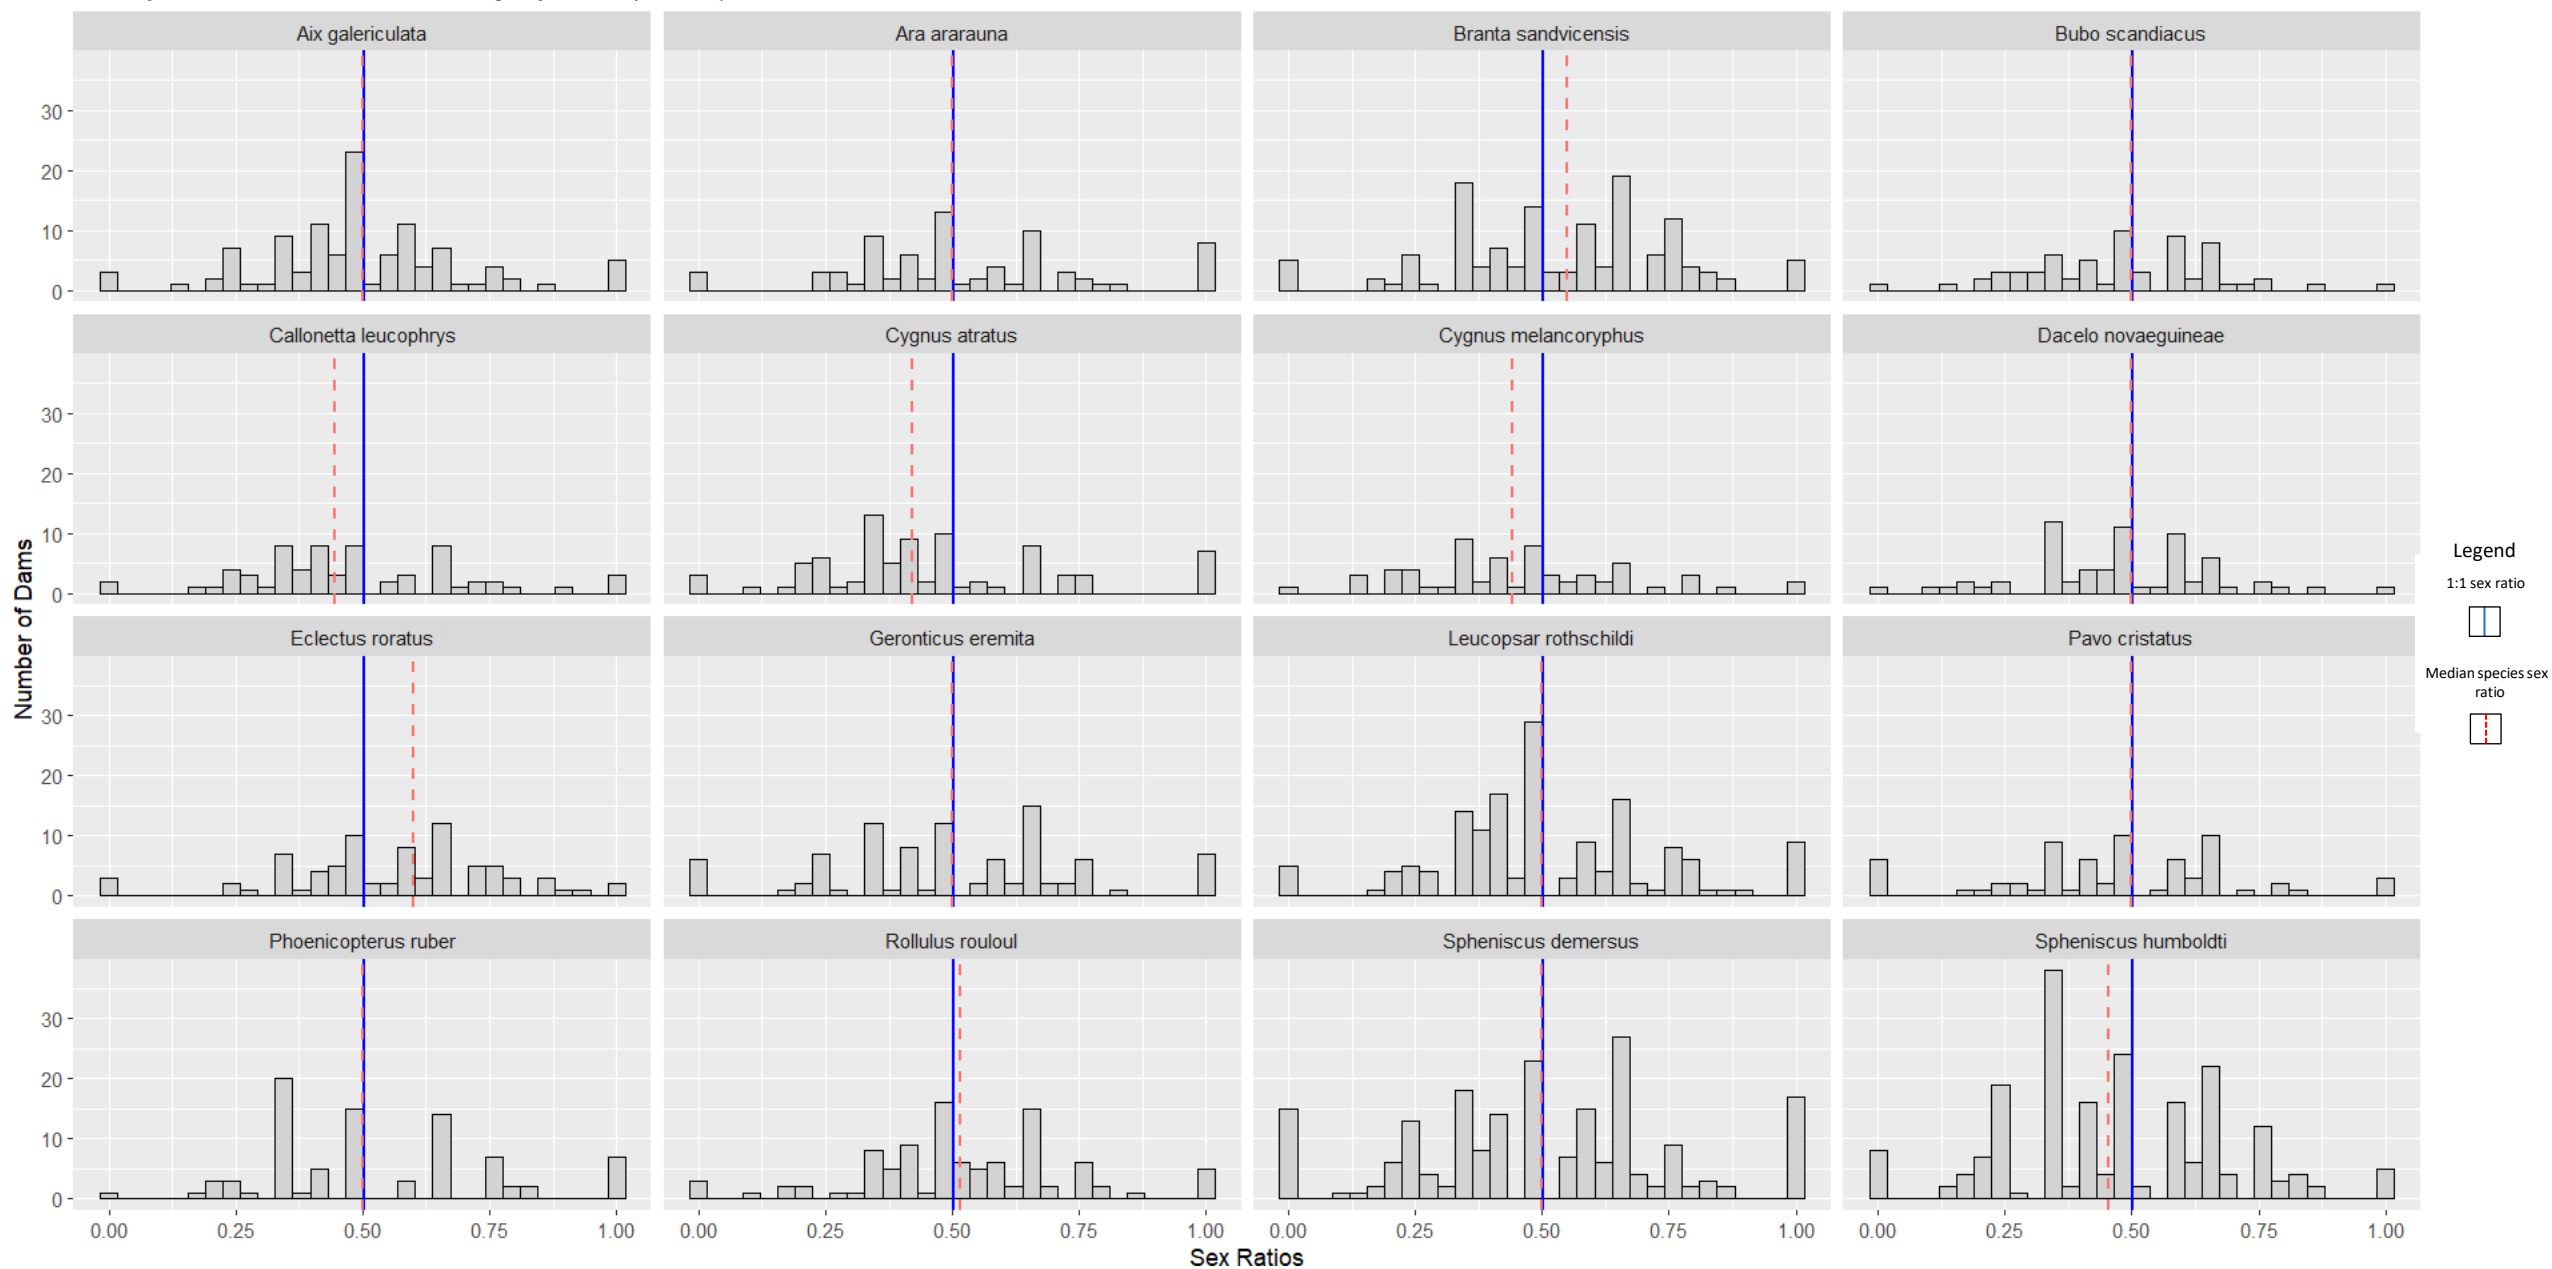

Time period 2 Dam Sex Ratios by Species (n < 23)

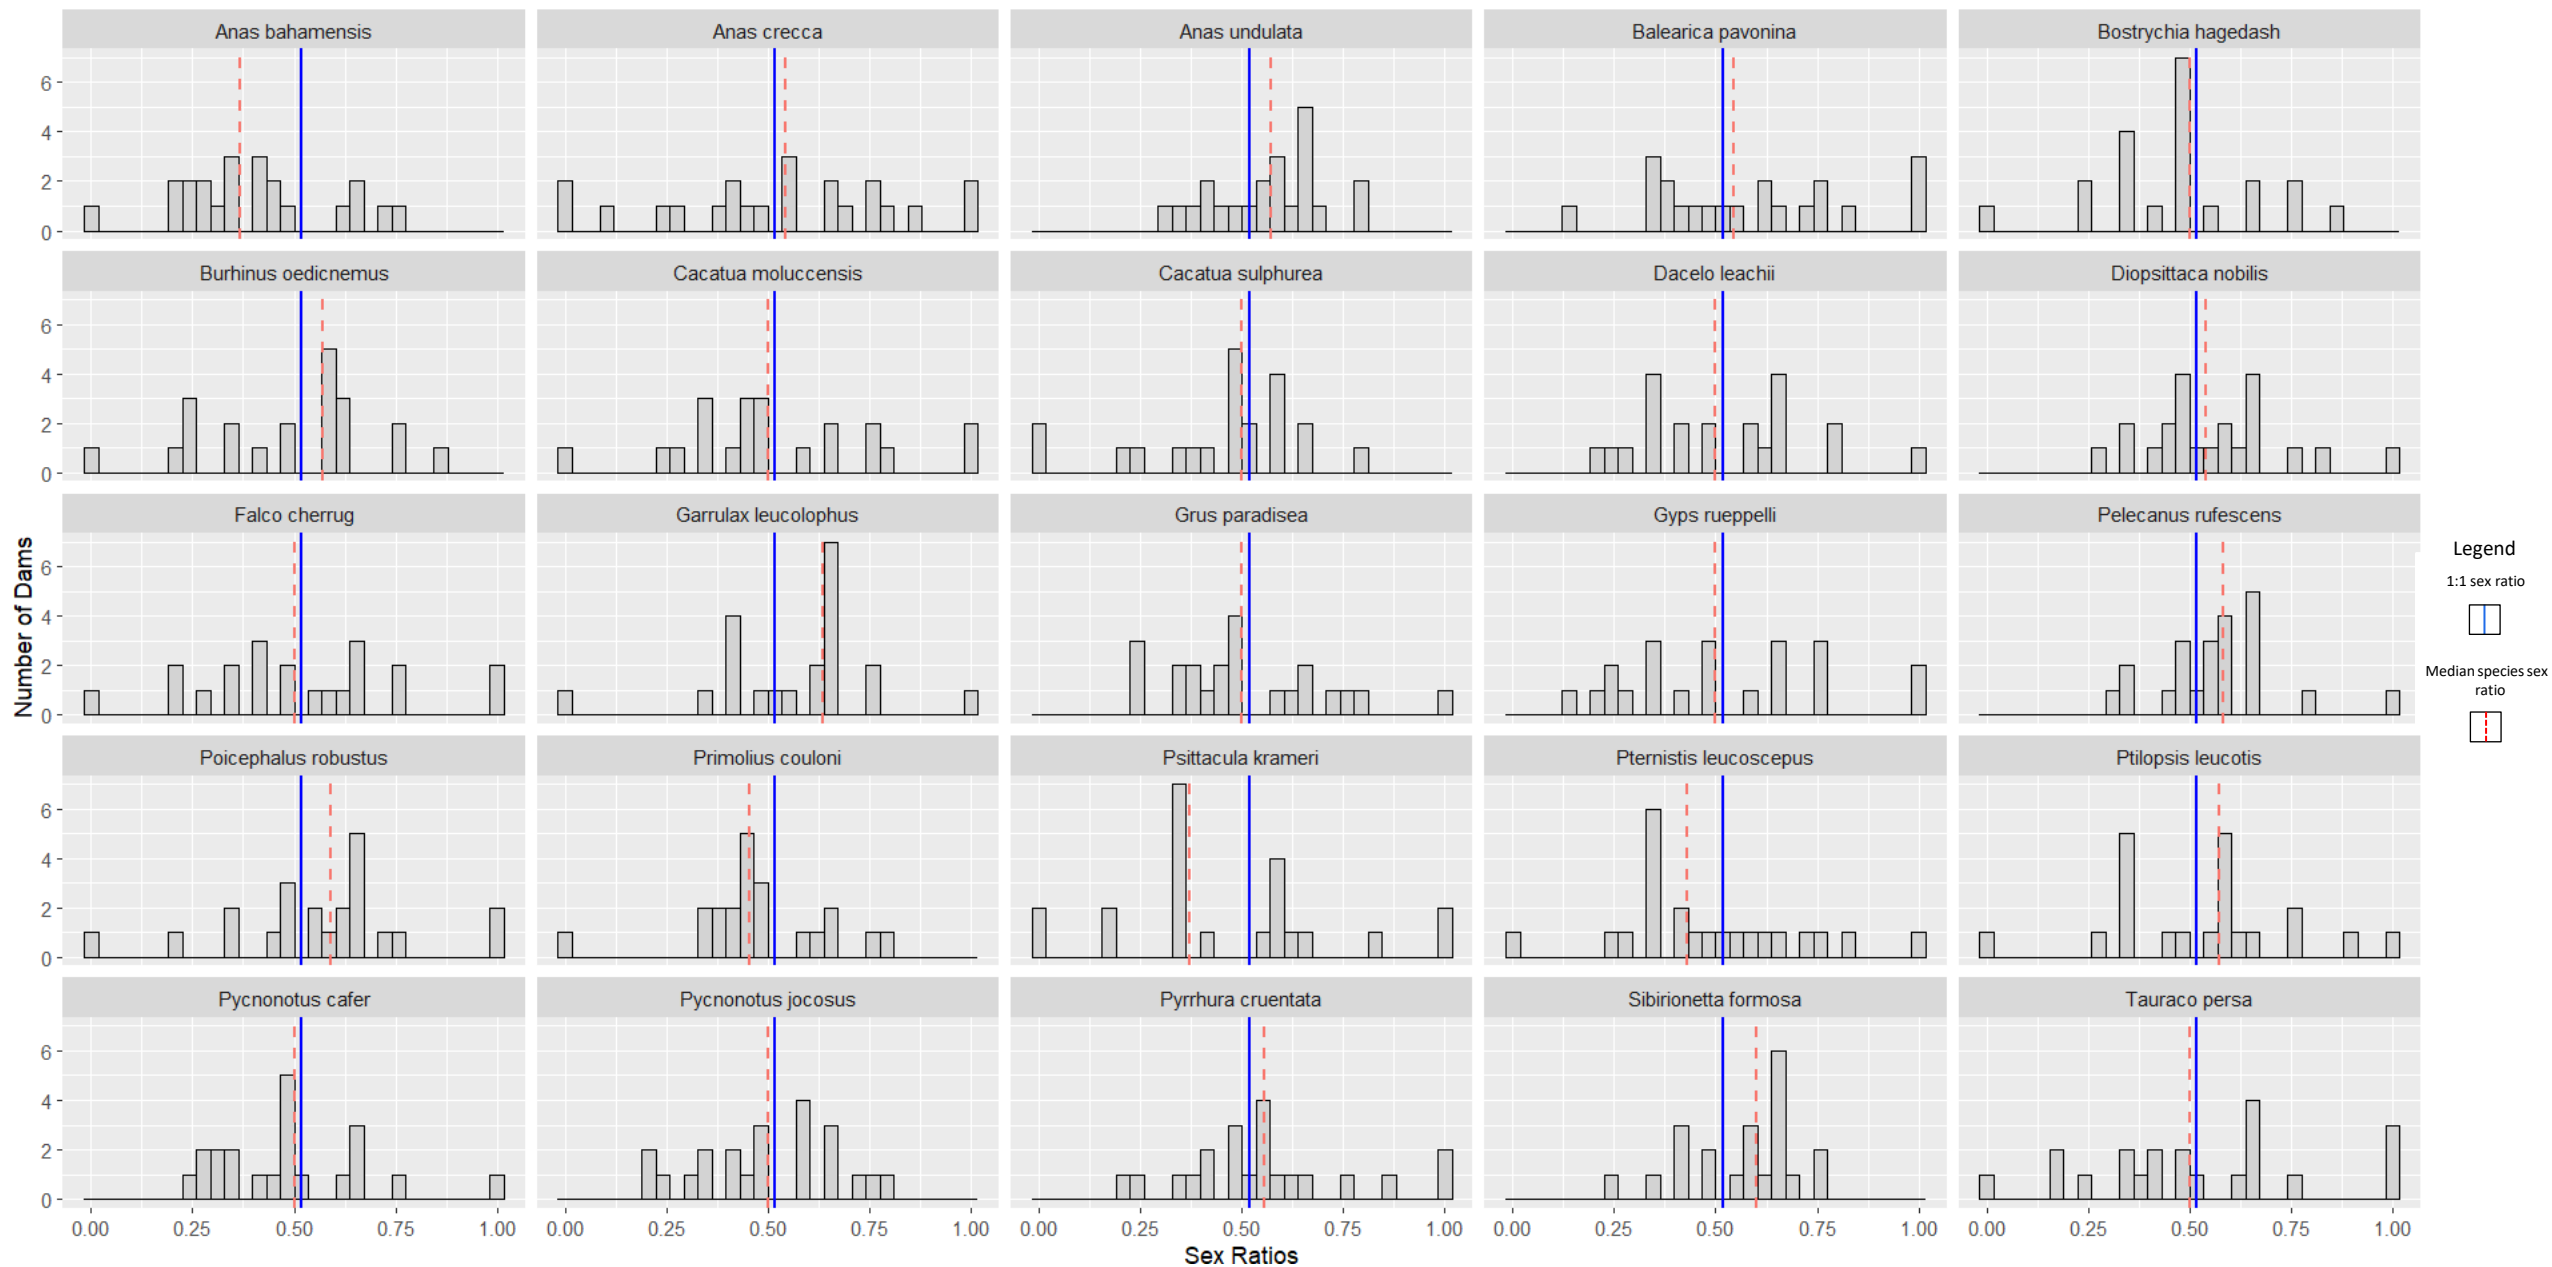

Time period 2 Dam Sex Ratios by Species (n = 23-25)

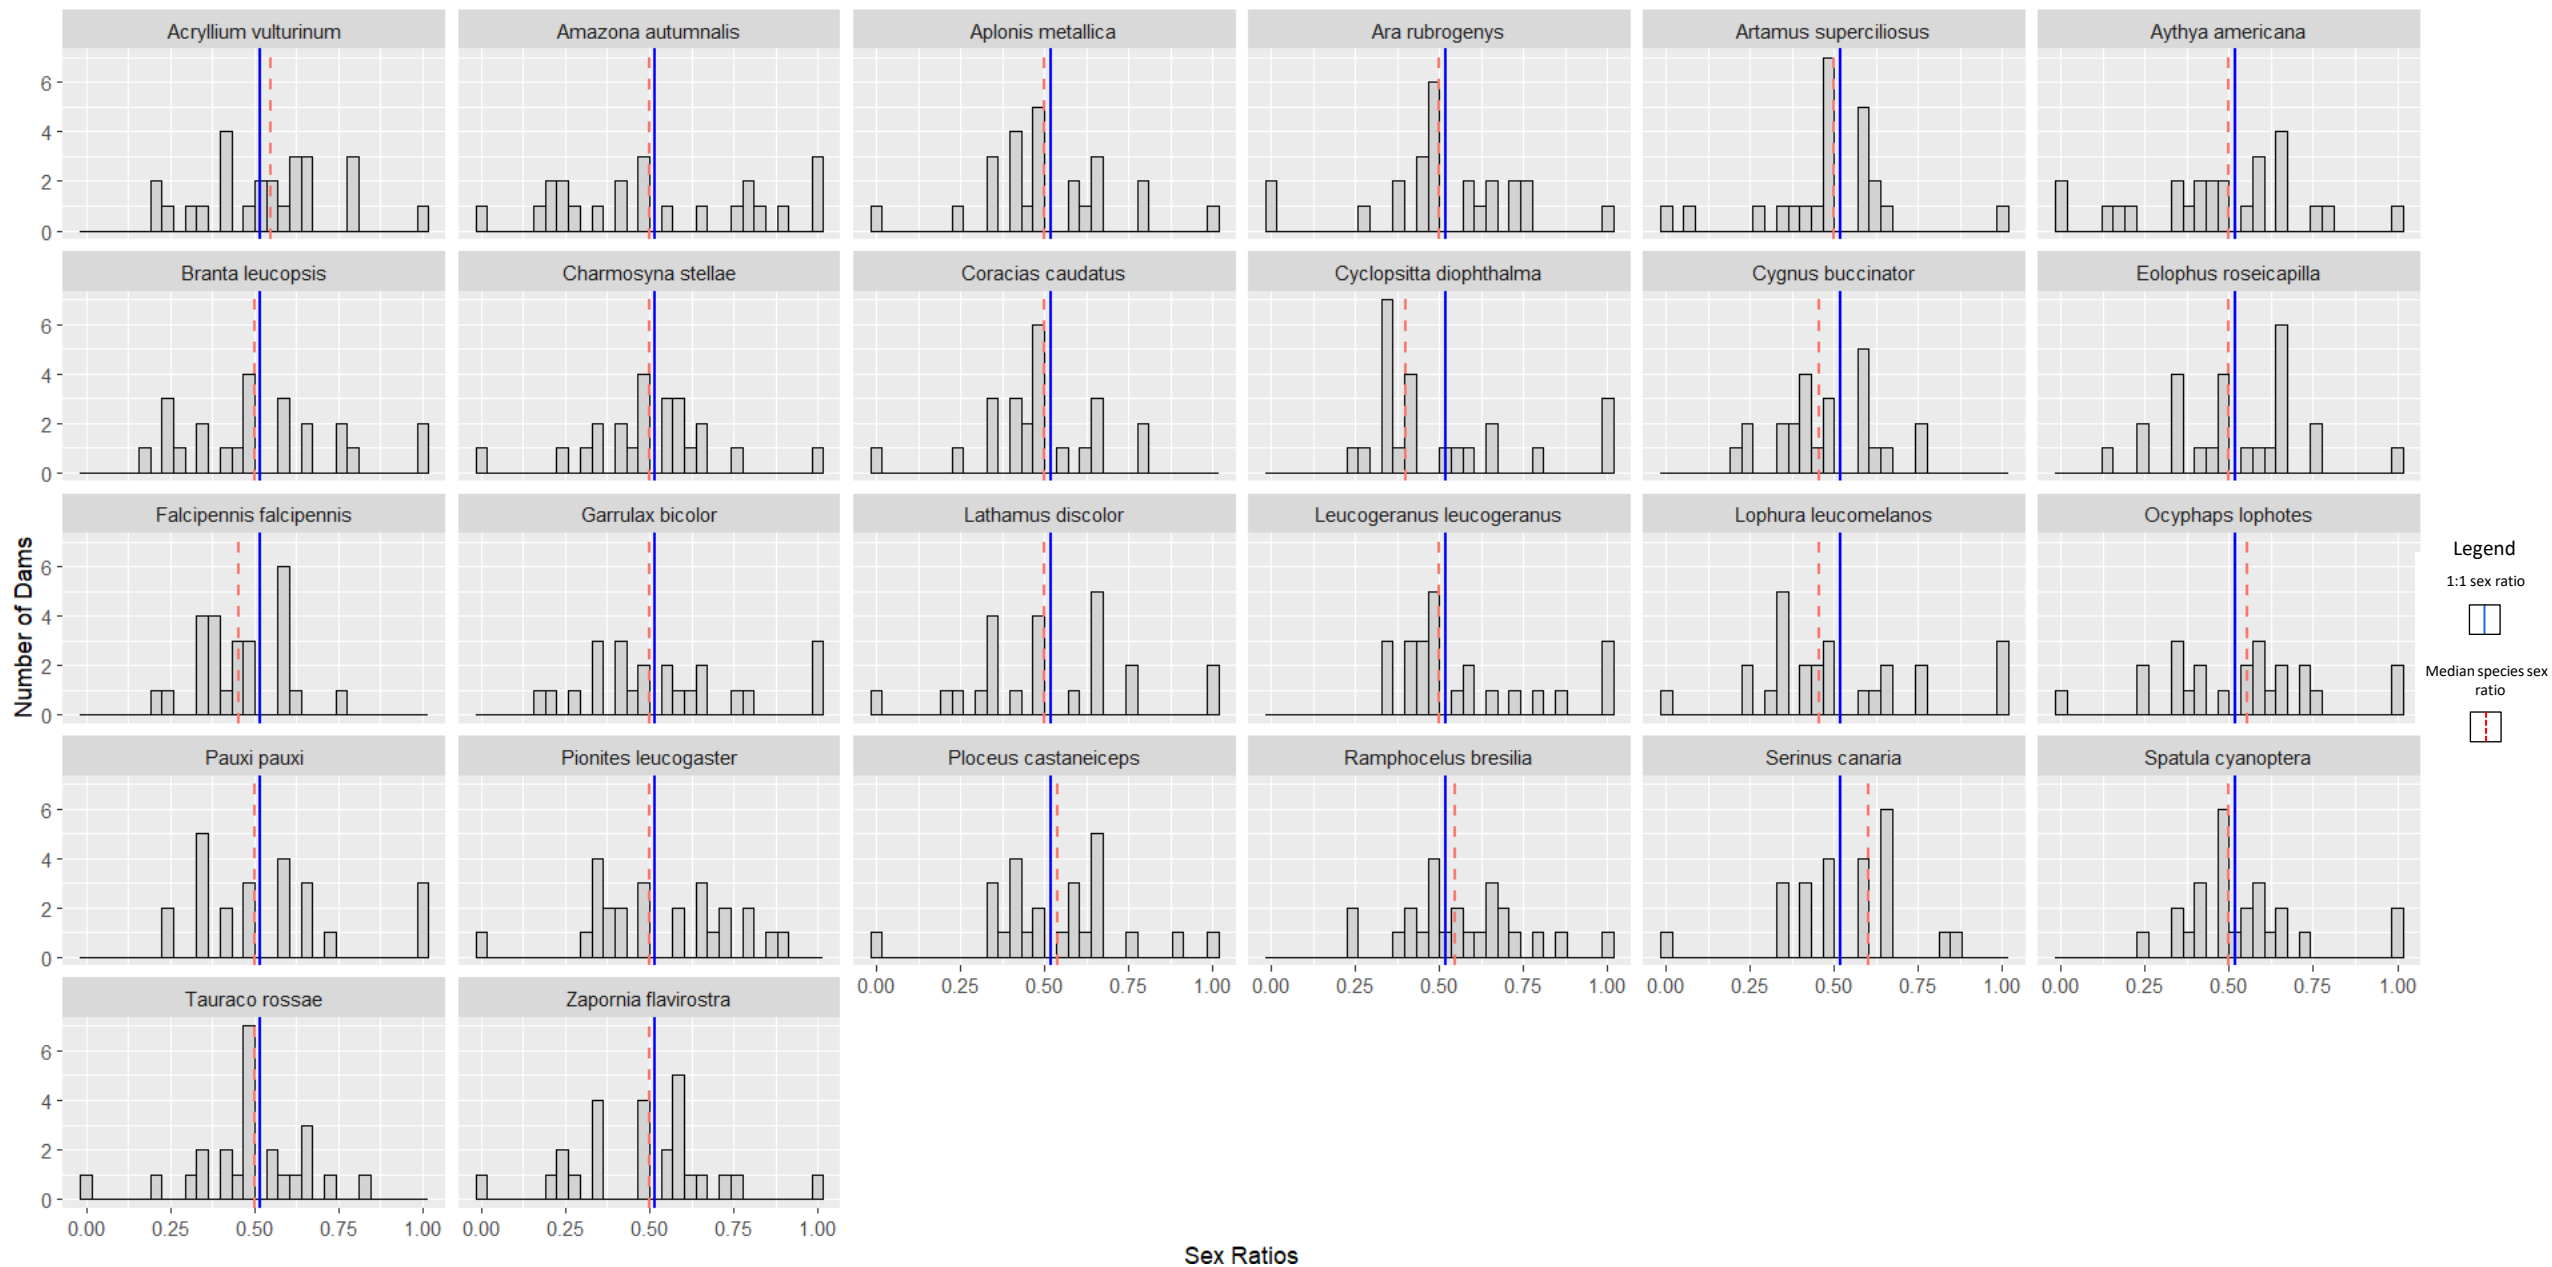

Time period 2 Dam Sex Ratios by Species (n = 26 - 27)

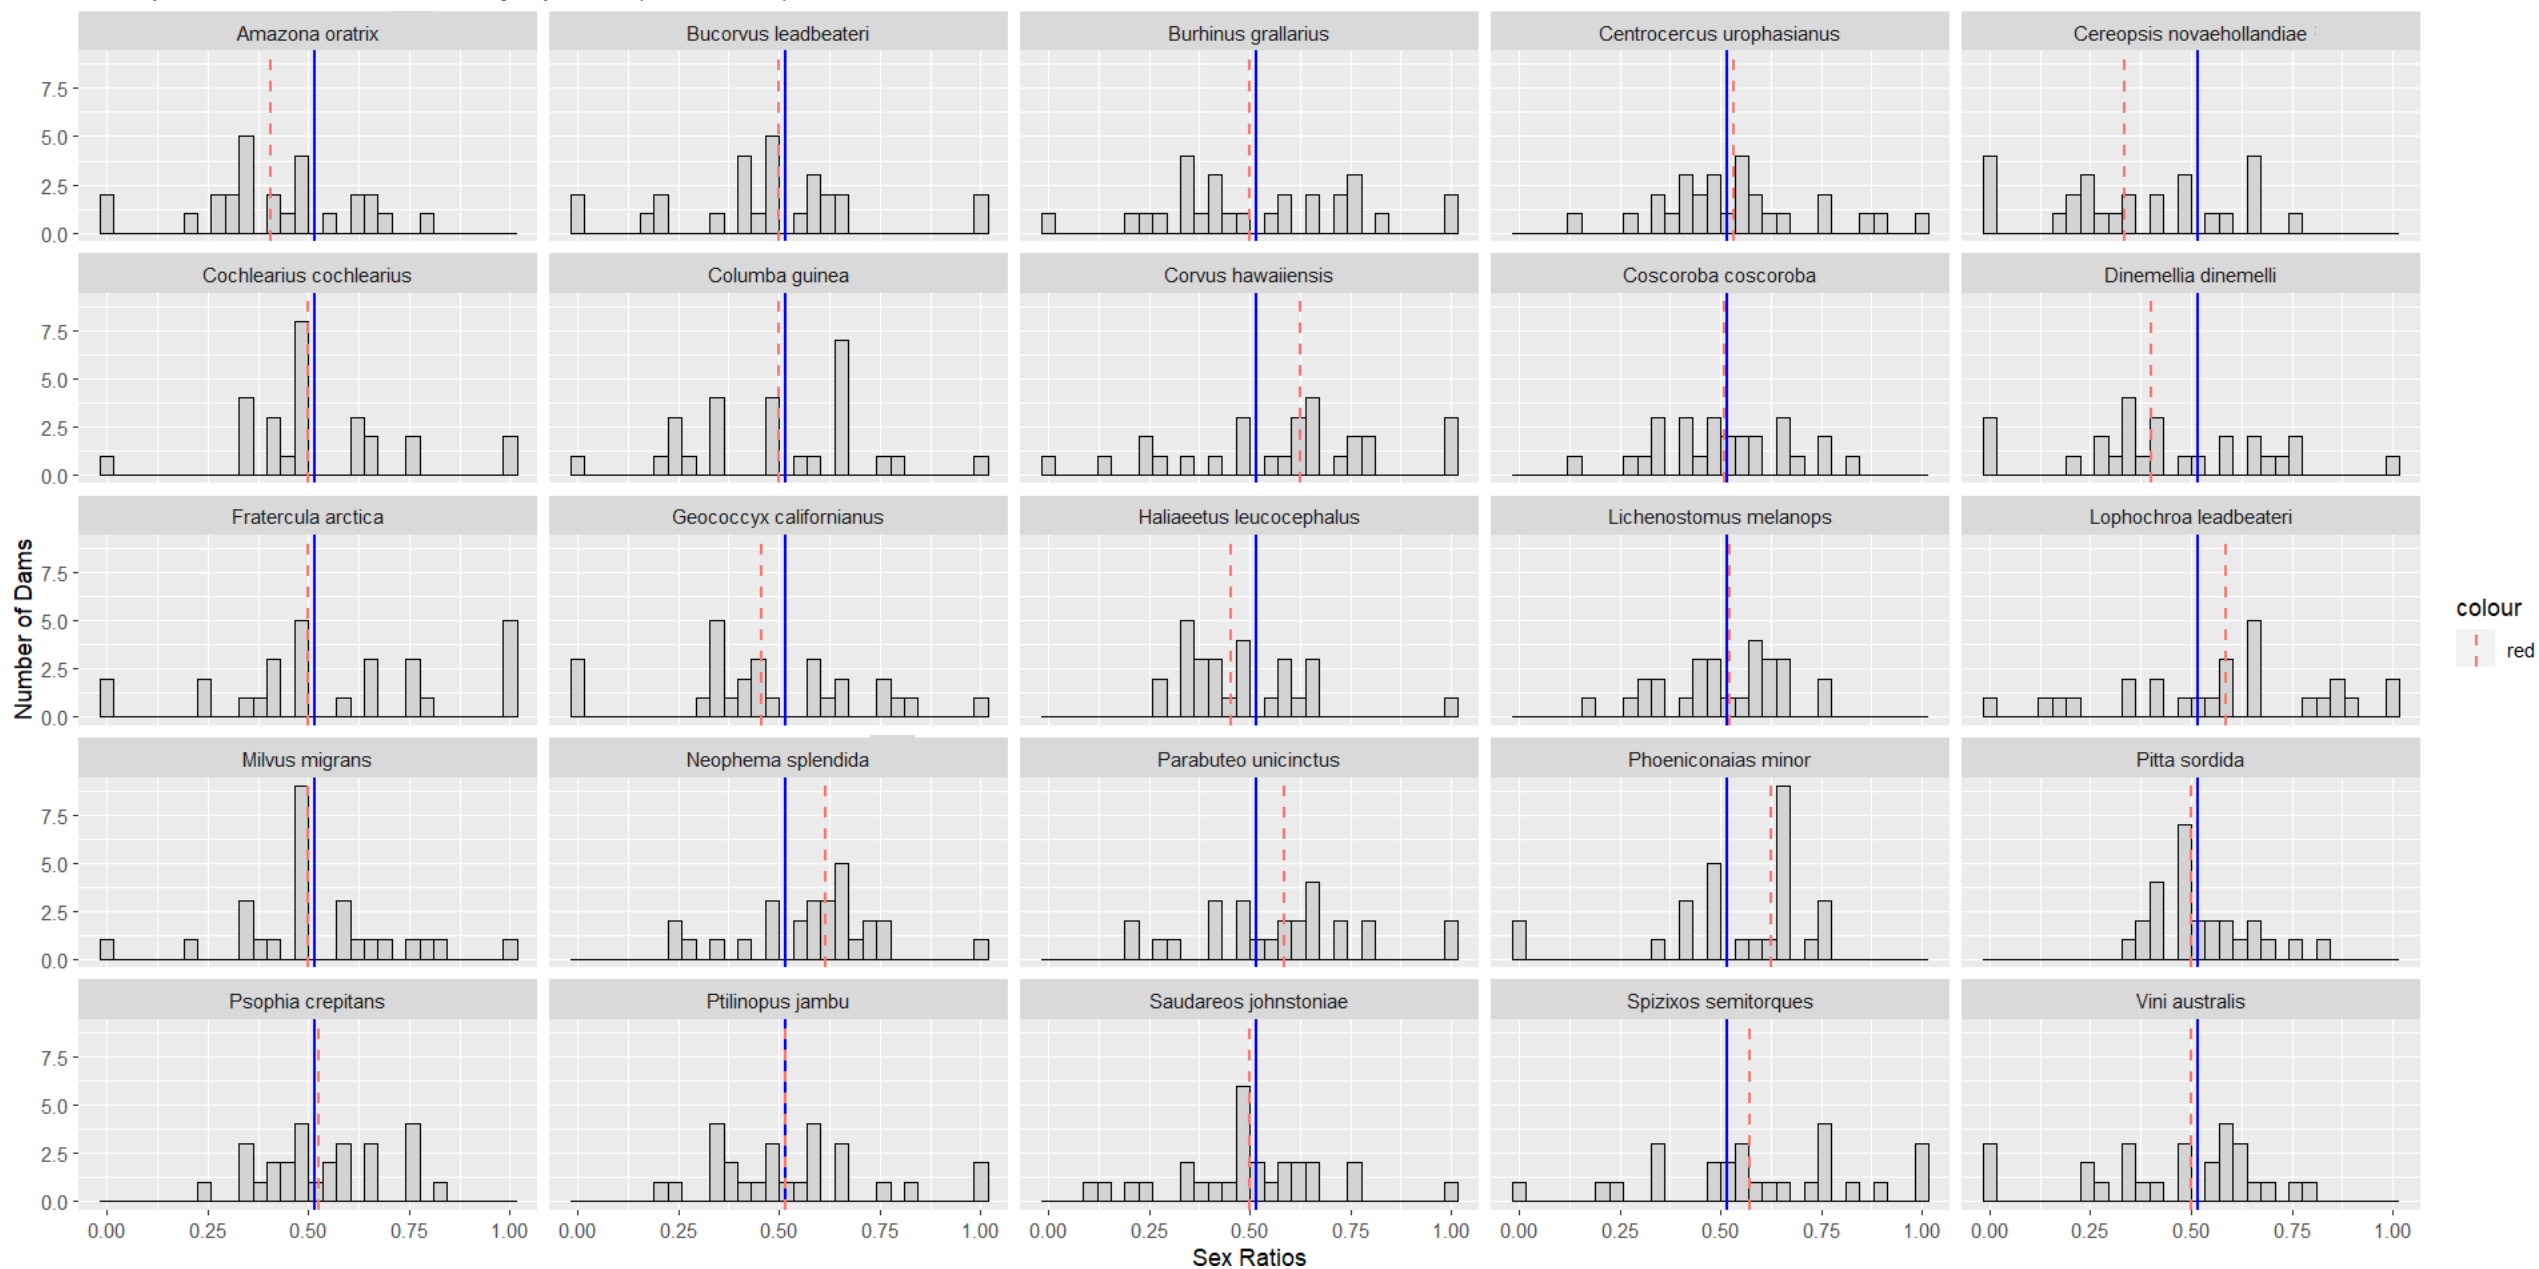



Time period 2 Dam Sex Ratios by Species (n = 28 - 30)

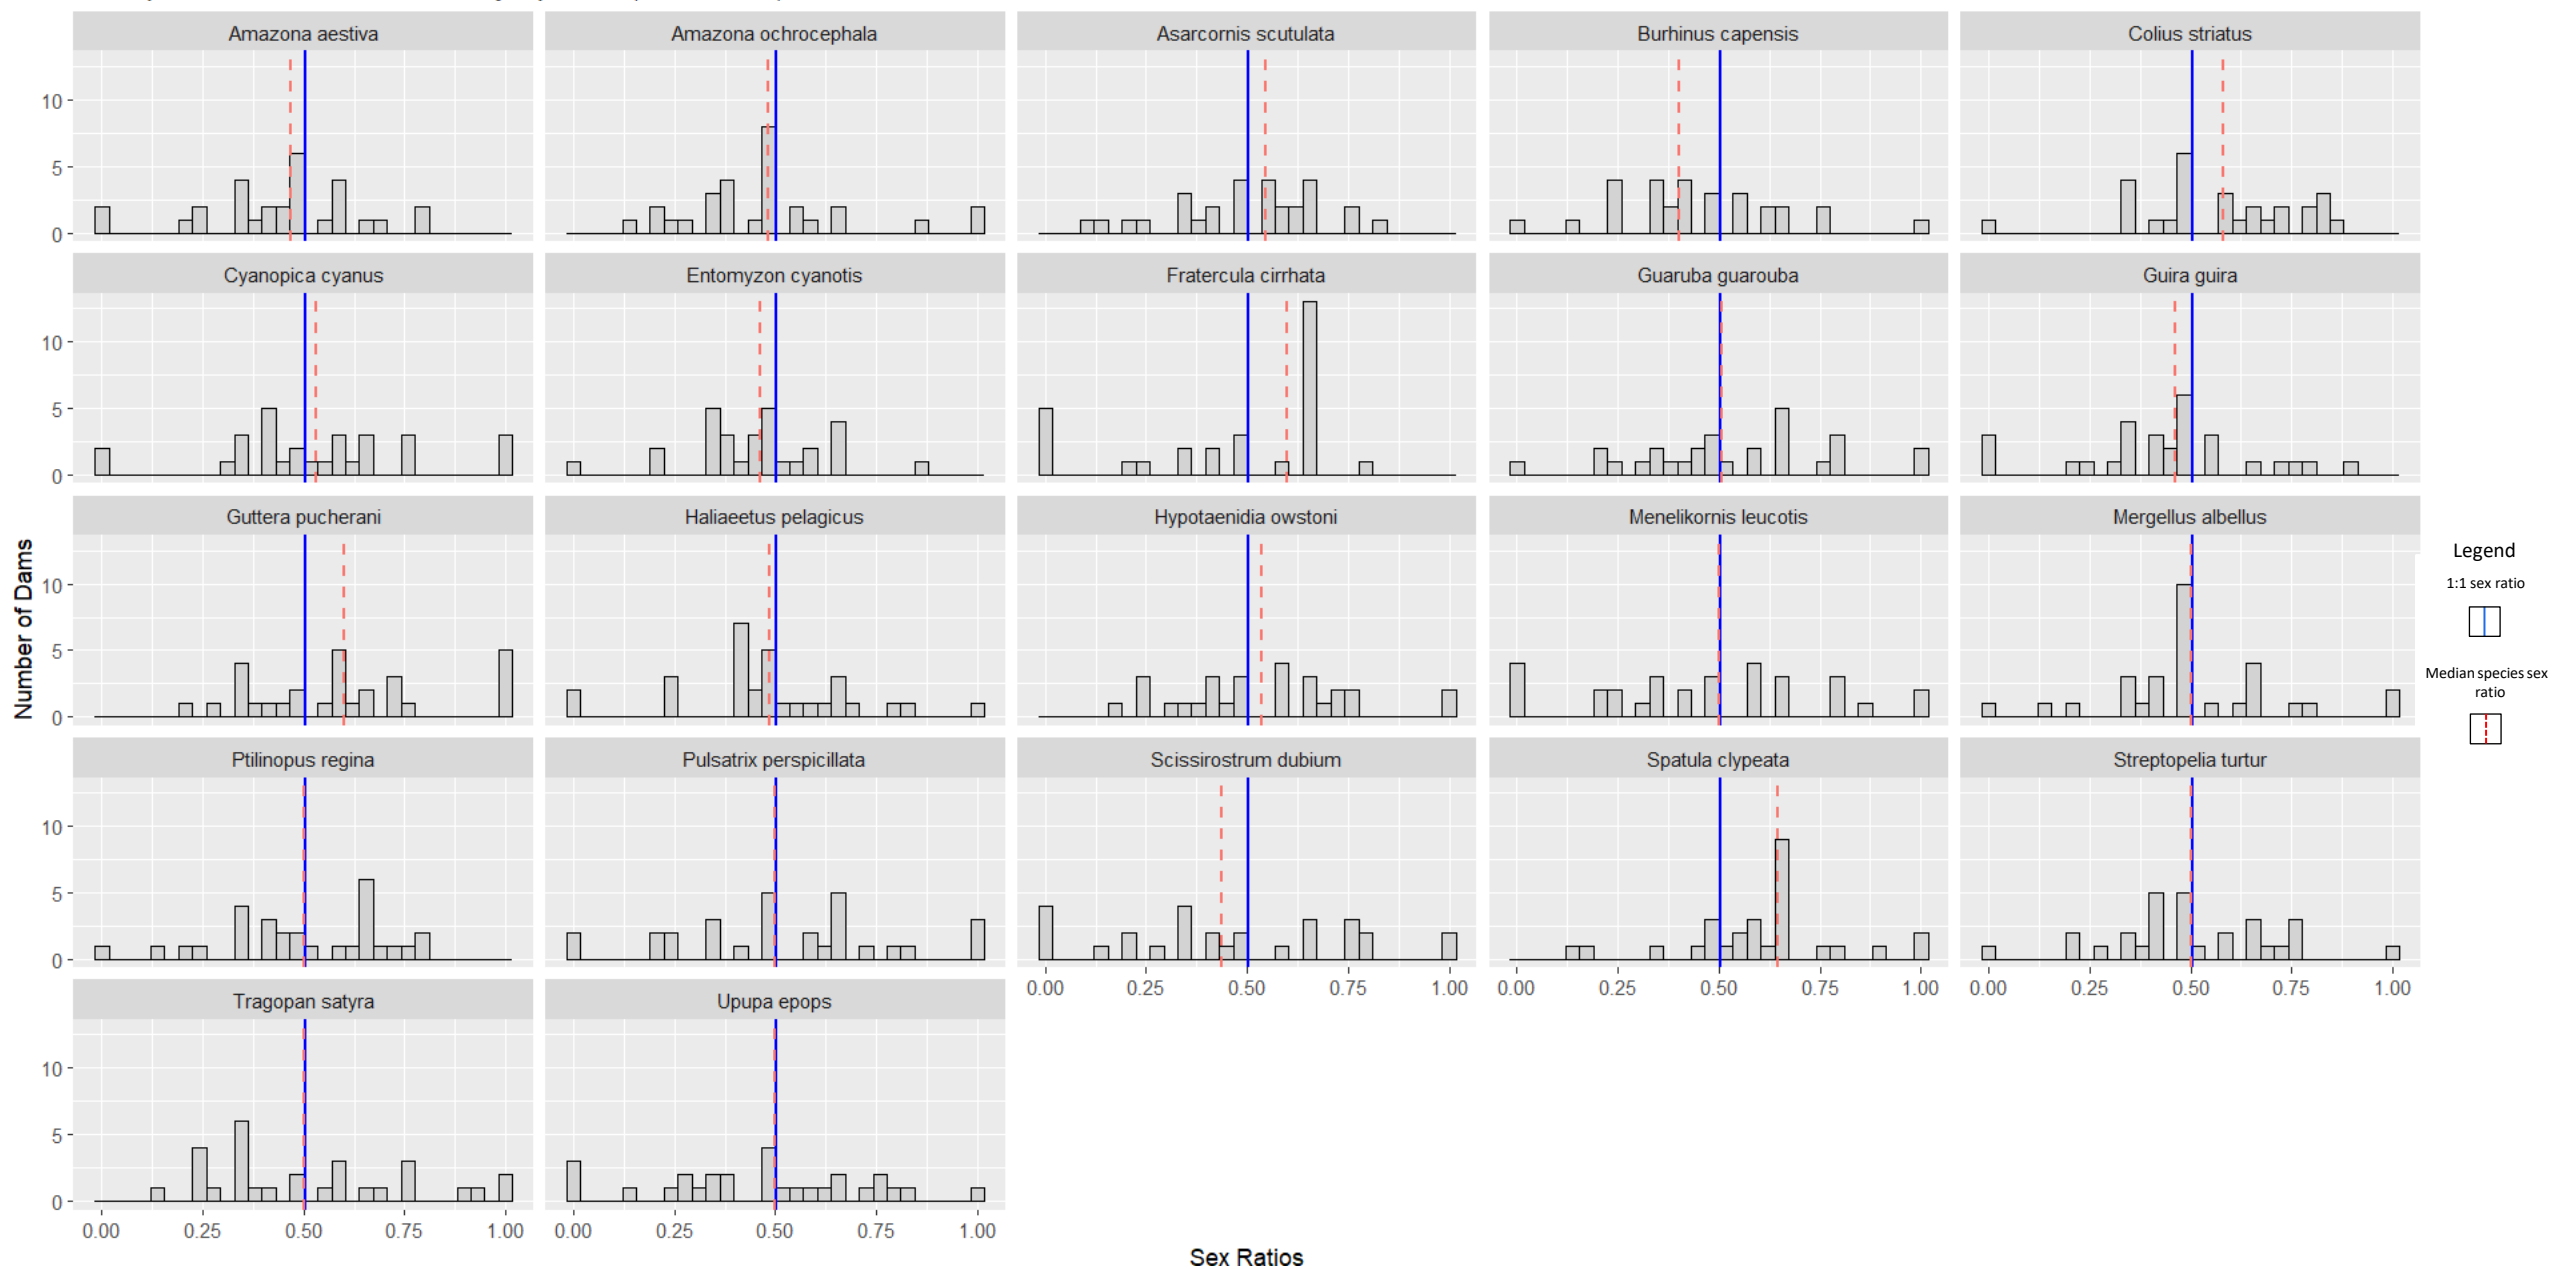

Time period 2 Dam Sex Ratios by Species (n = 31 - 34)

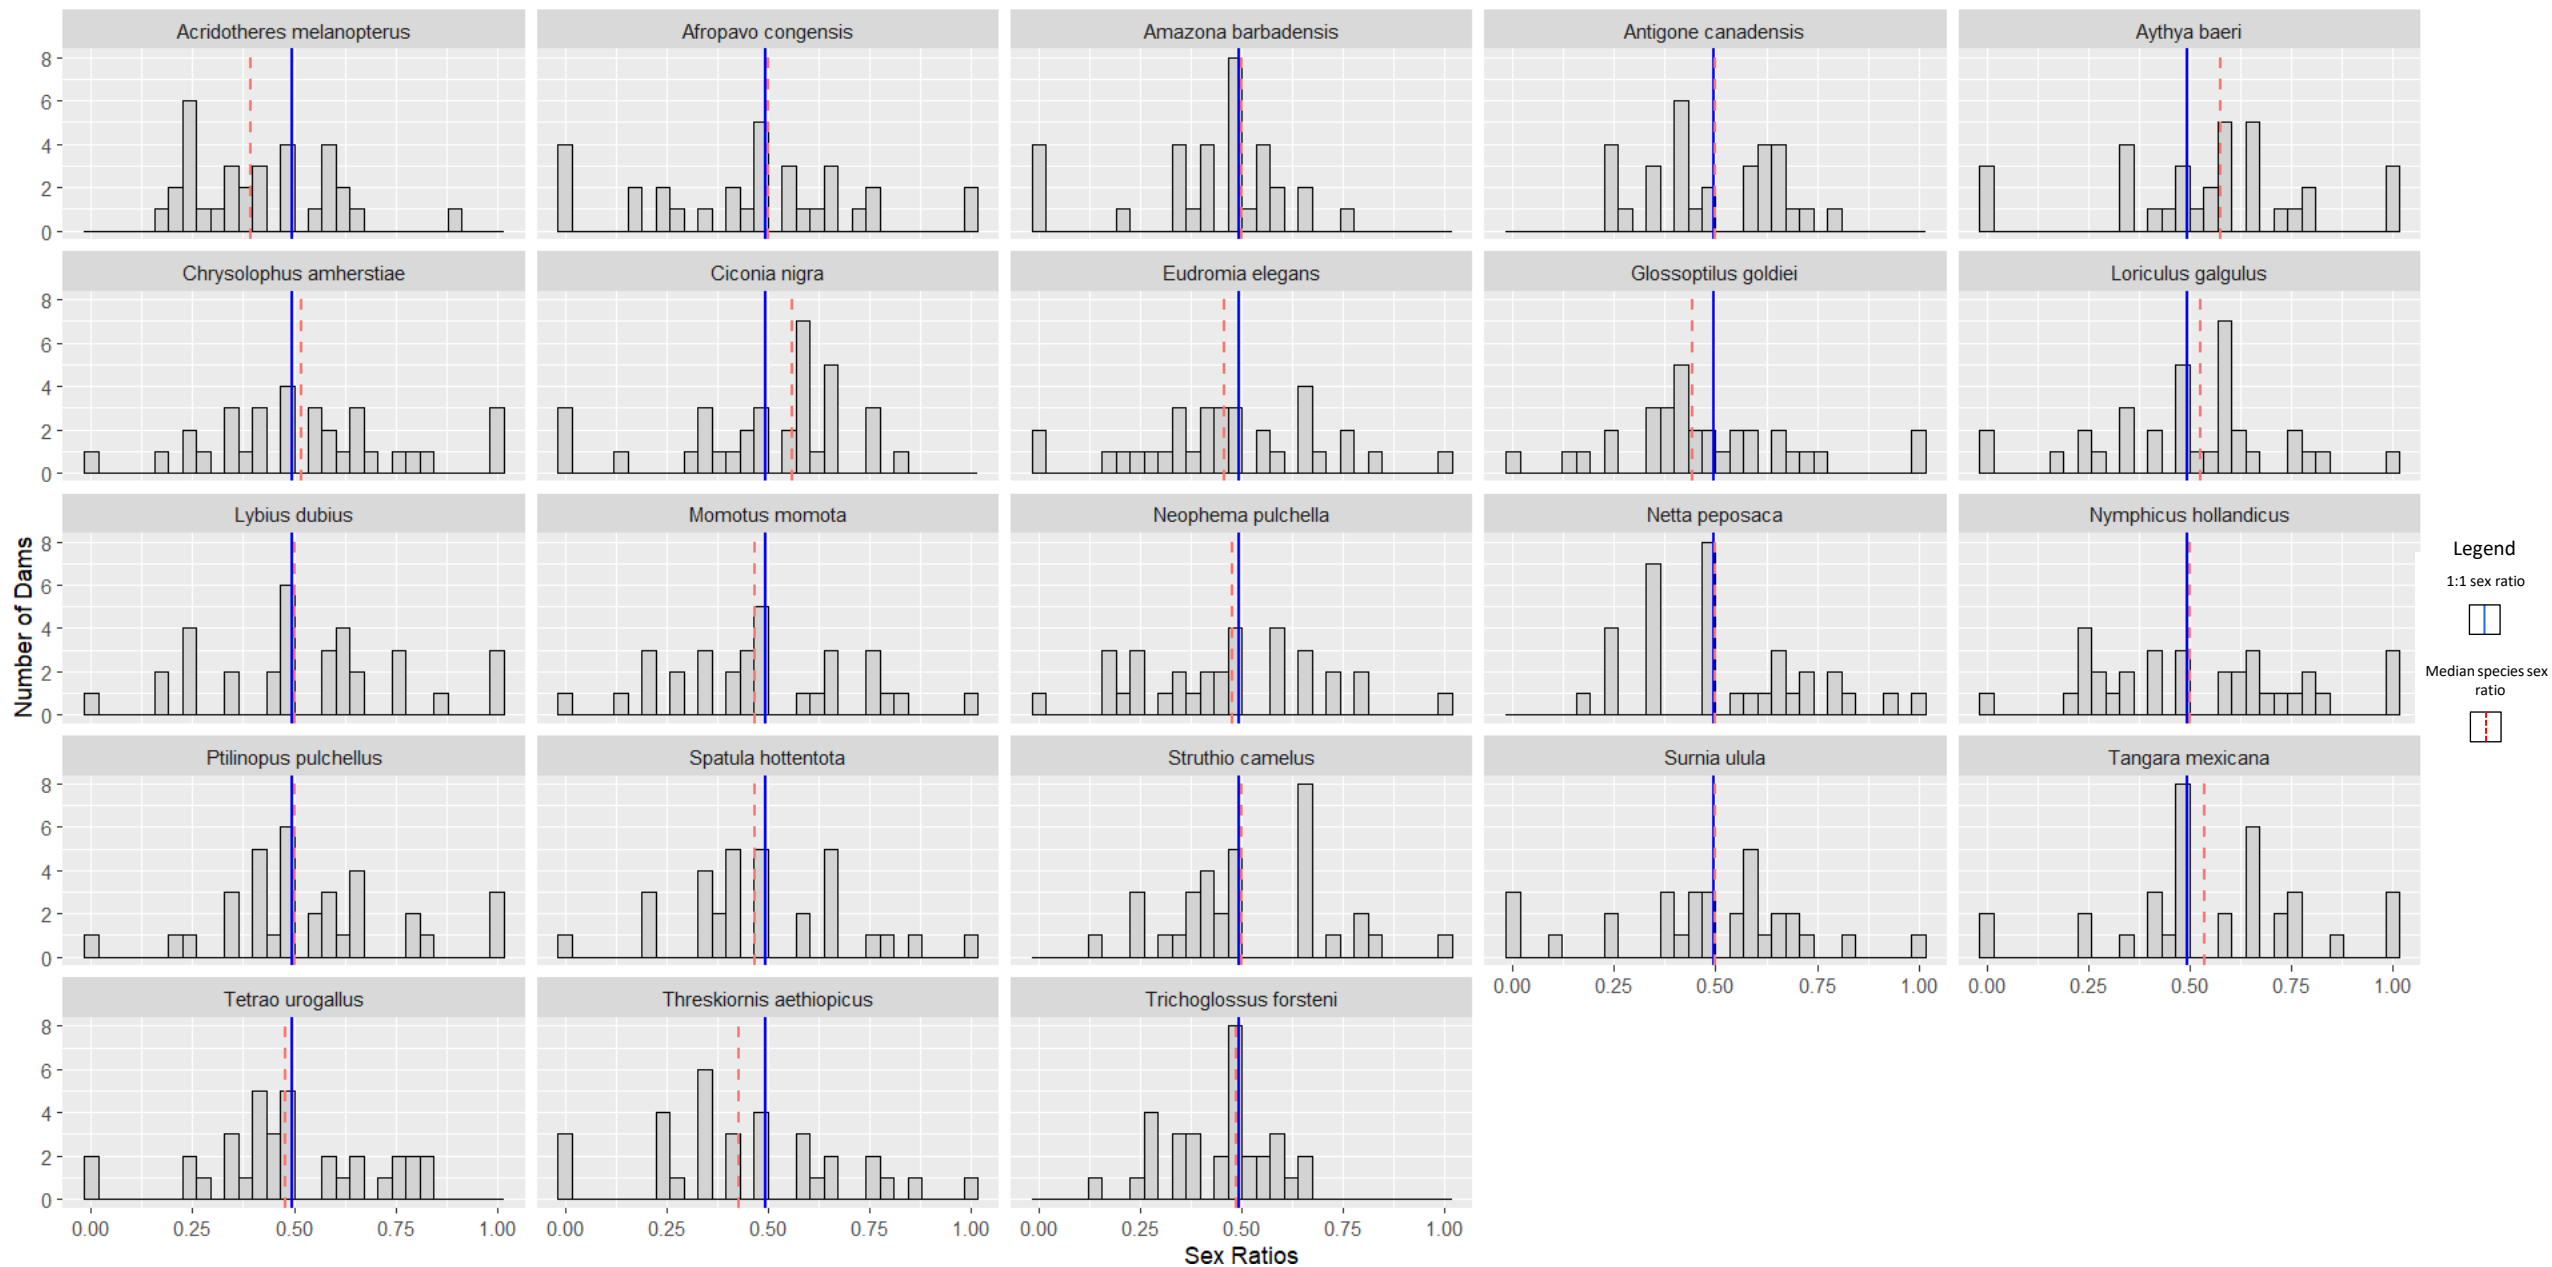

Time period 2 Dam Sex Ratios by Species (n = 35 - 39)

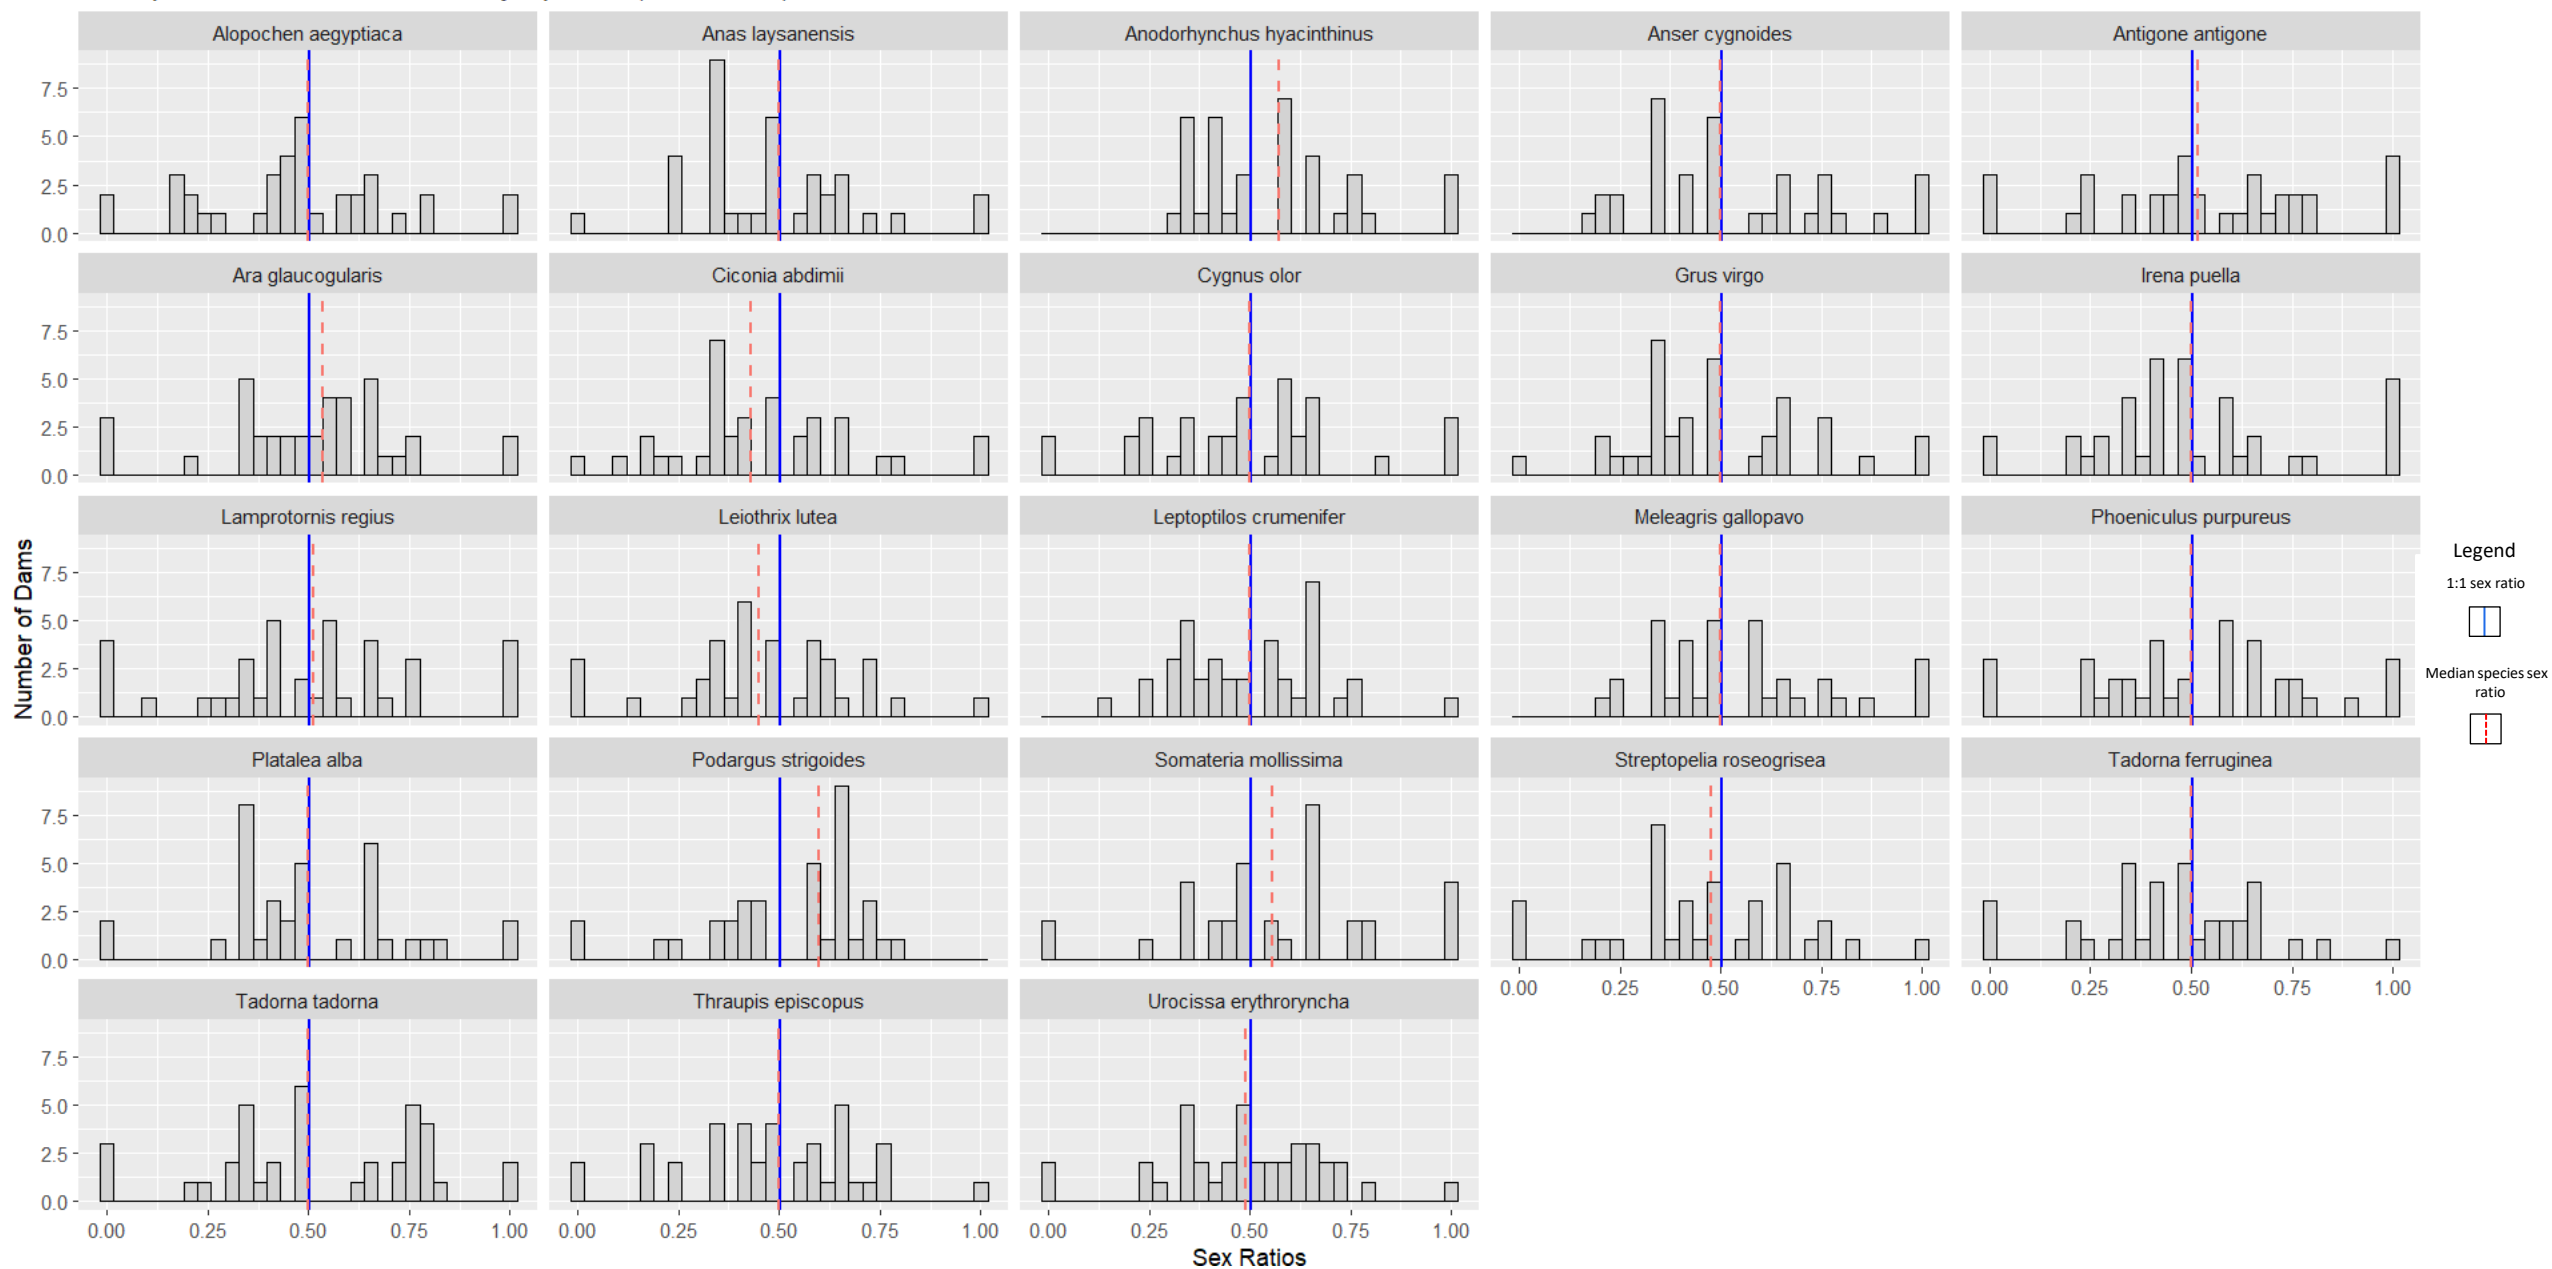

Time period 2 Dam Sex Ratios by Species (n = 40 - 44)

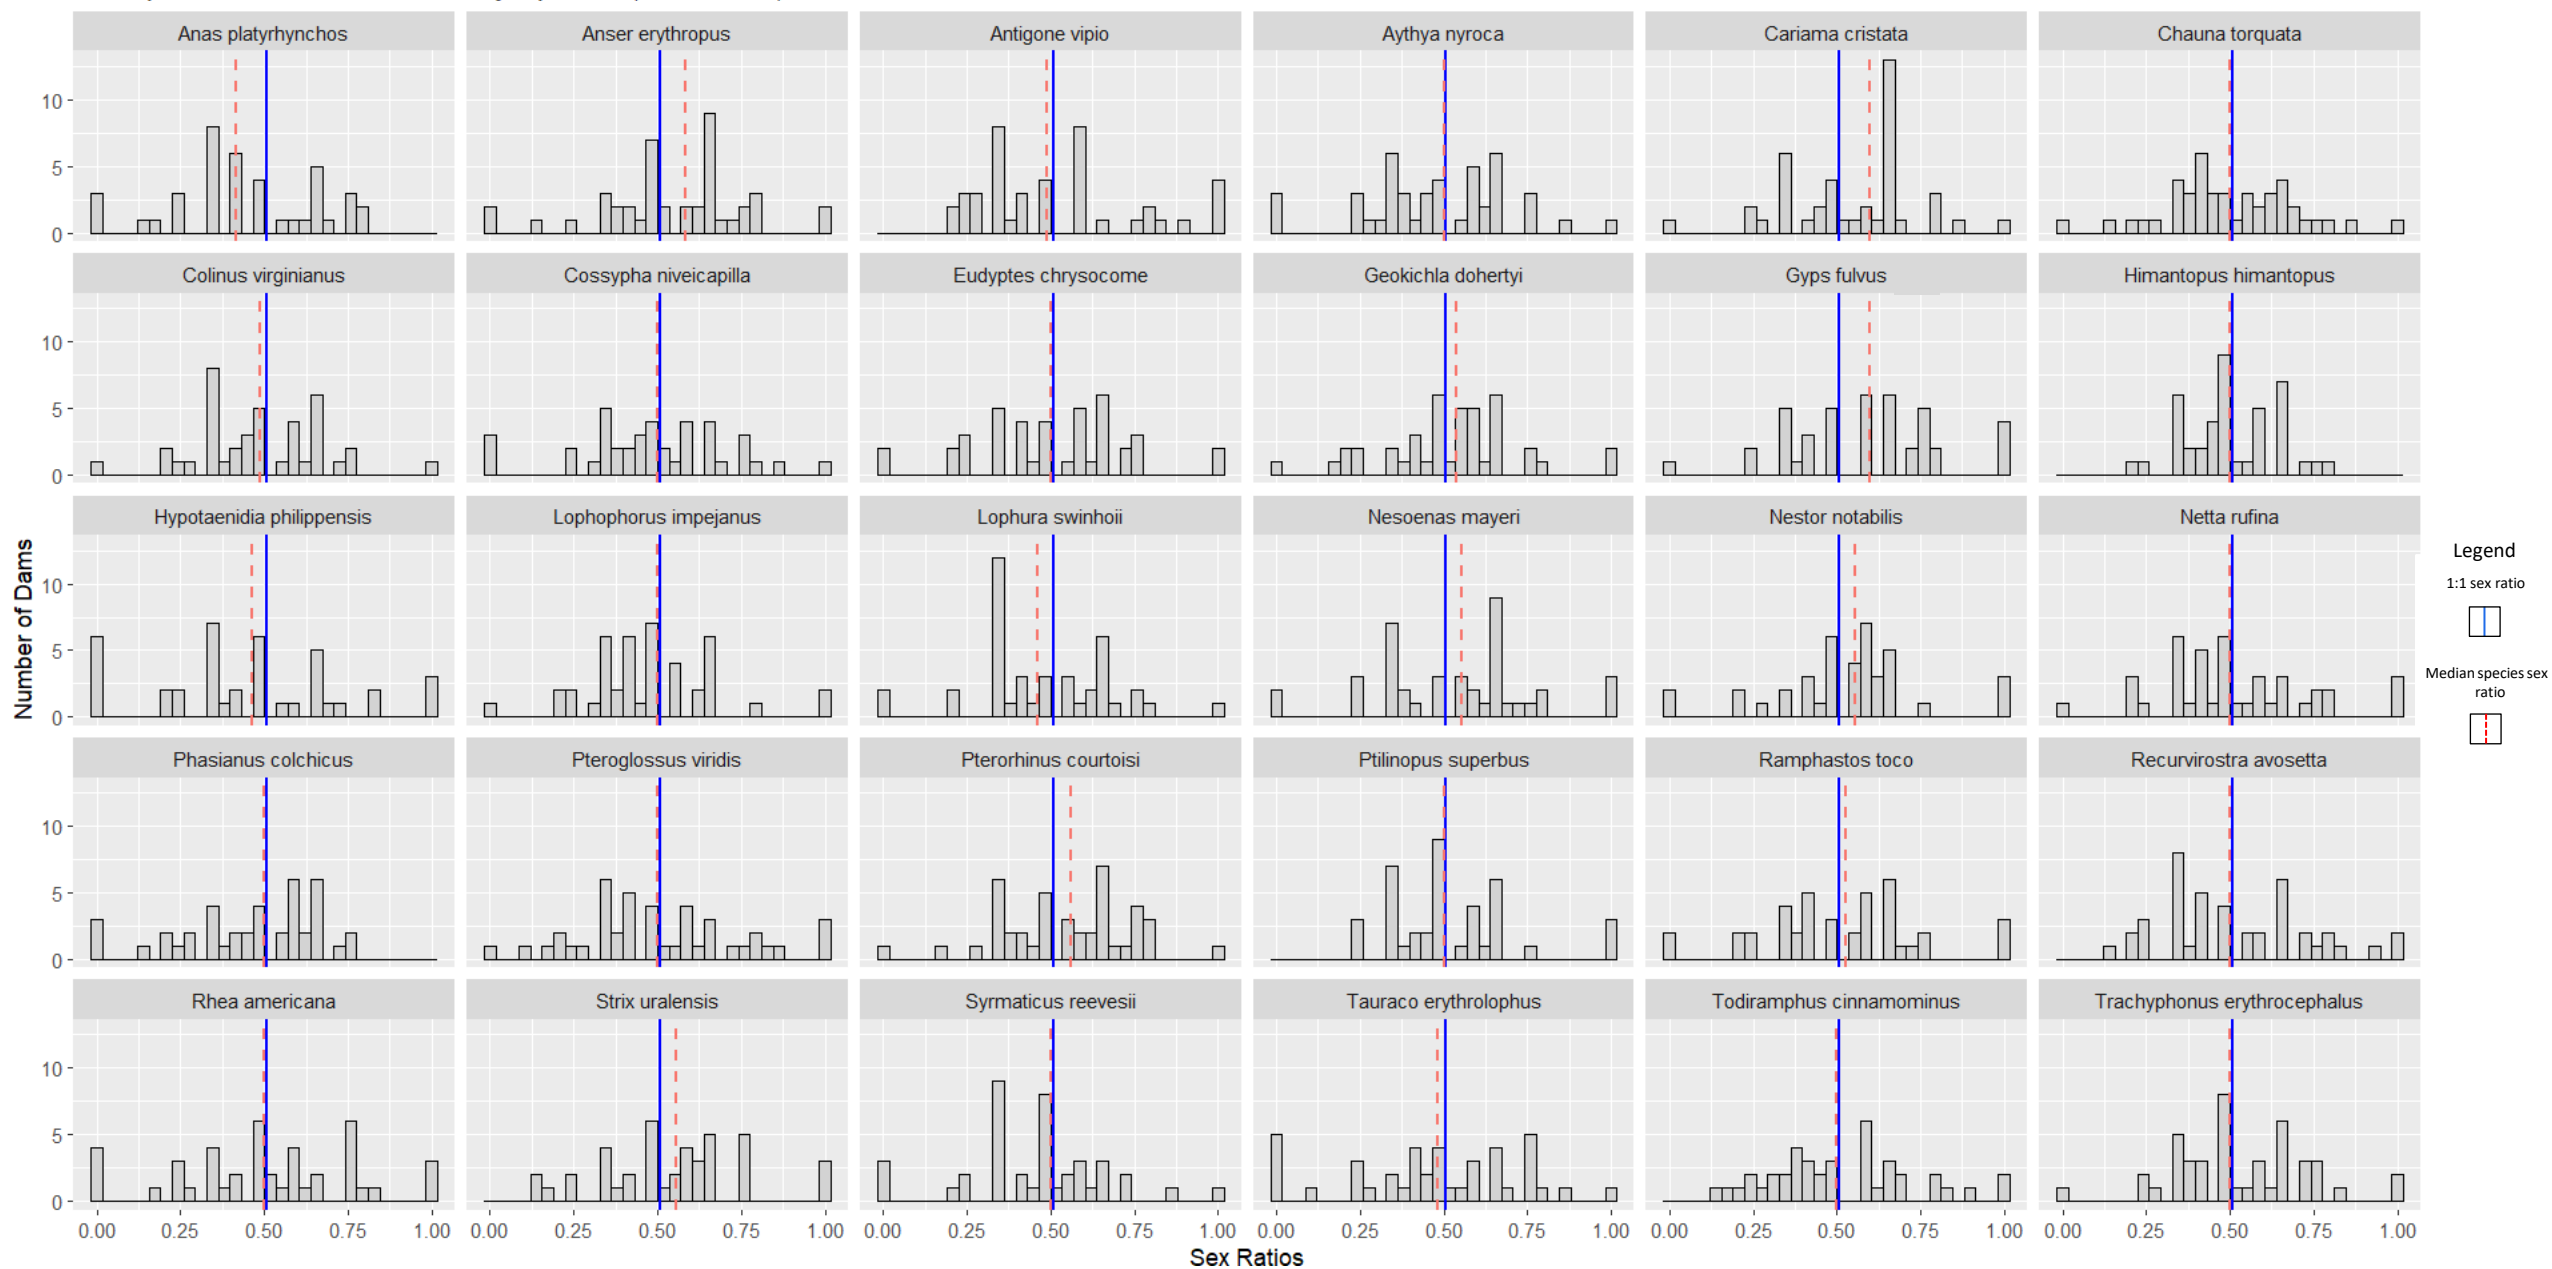

Time period 2 Dam Sex Ratios by Species (n = 45 - 53)

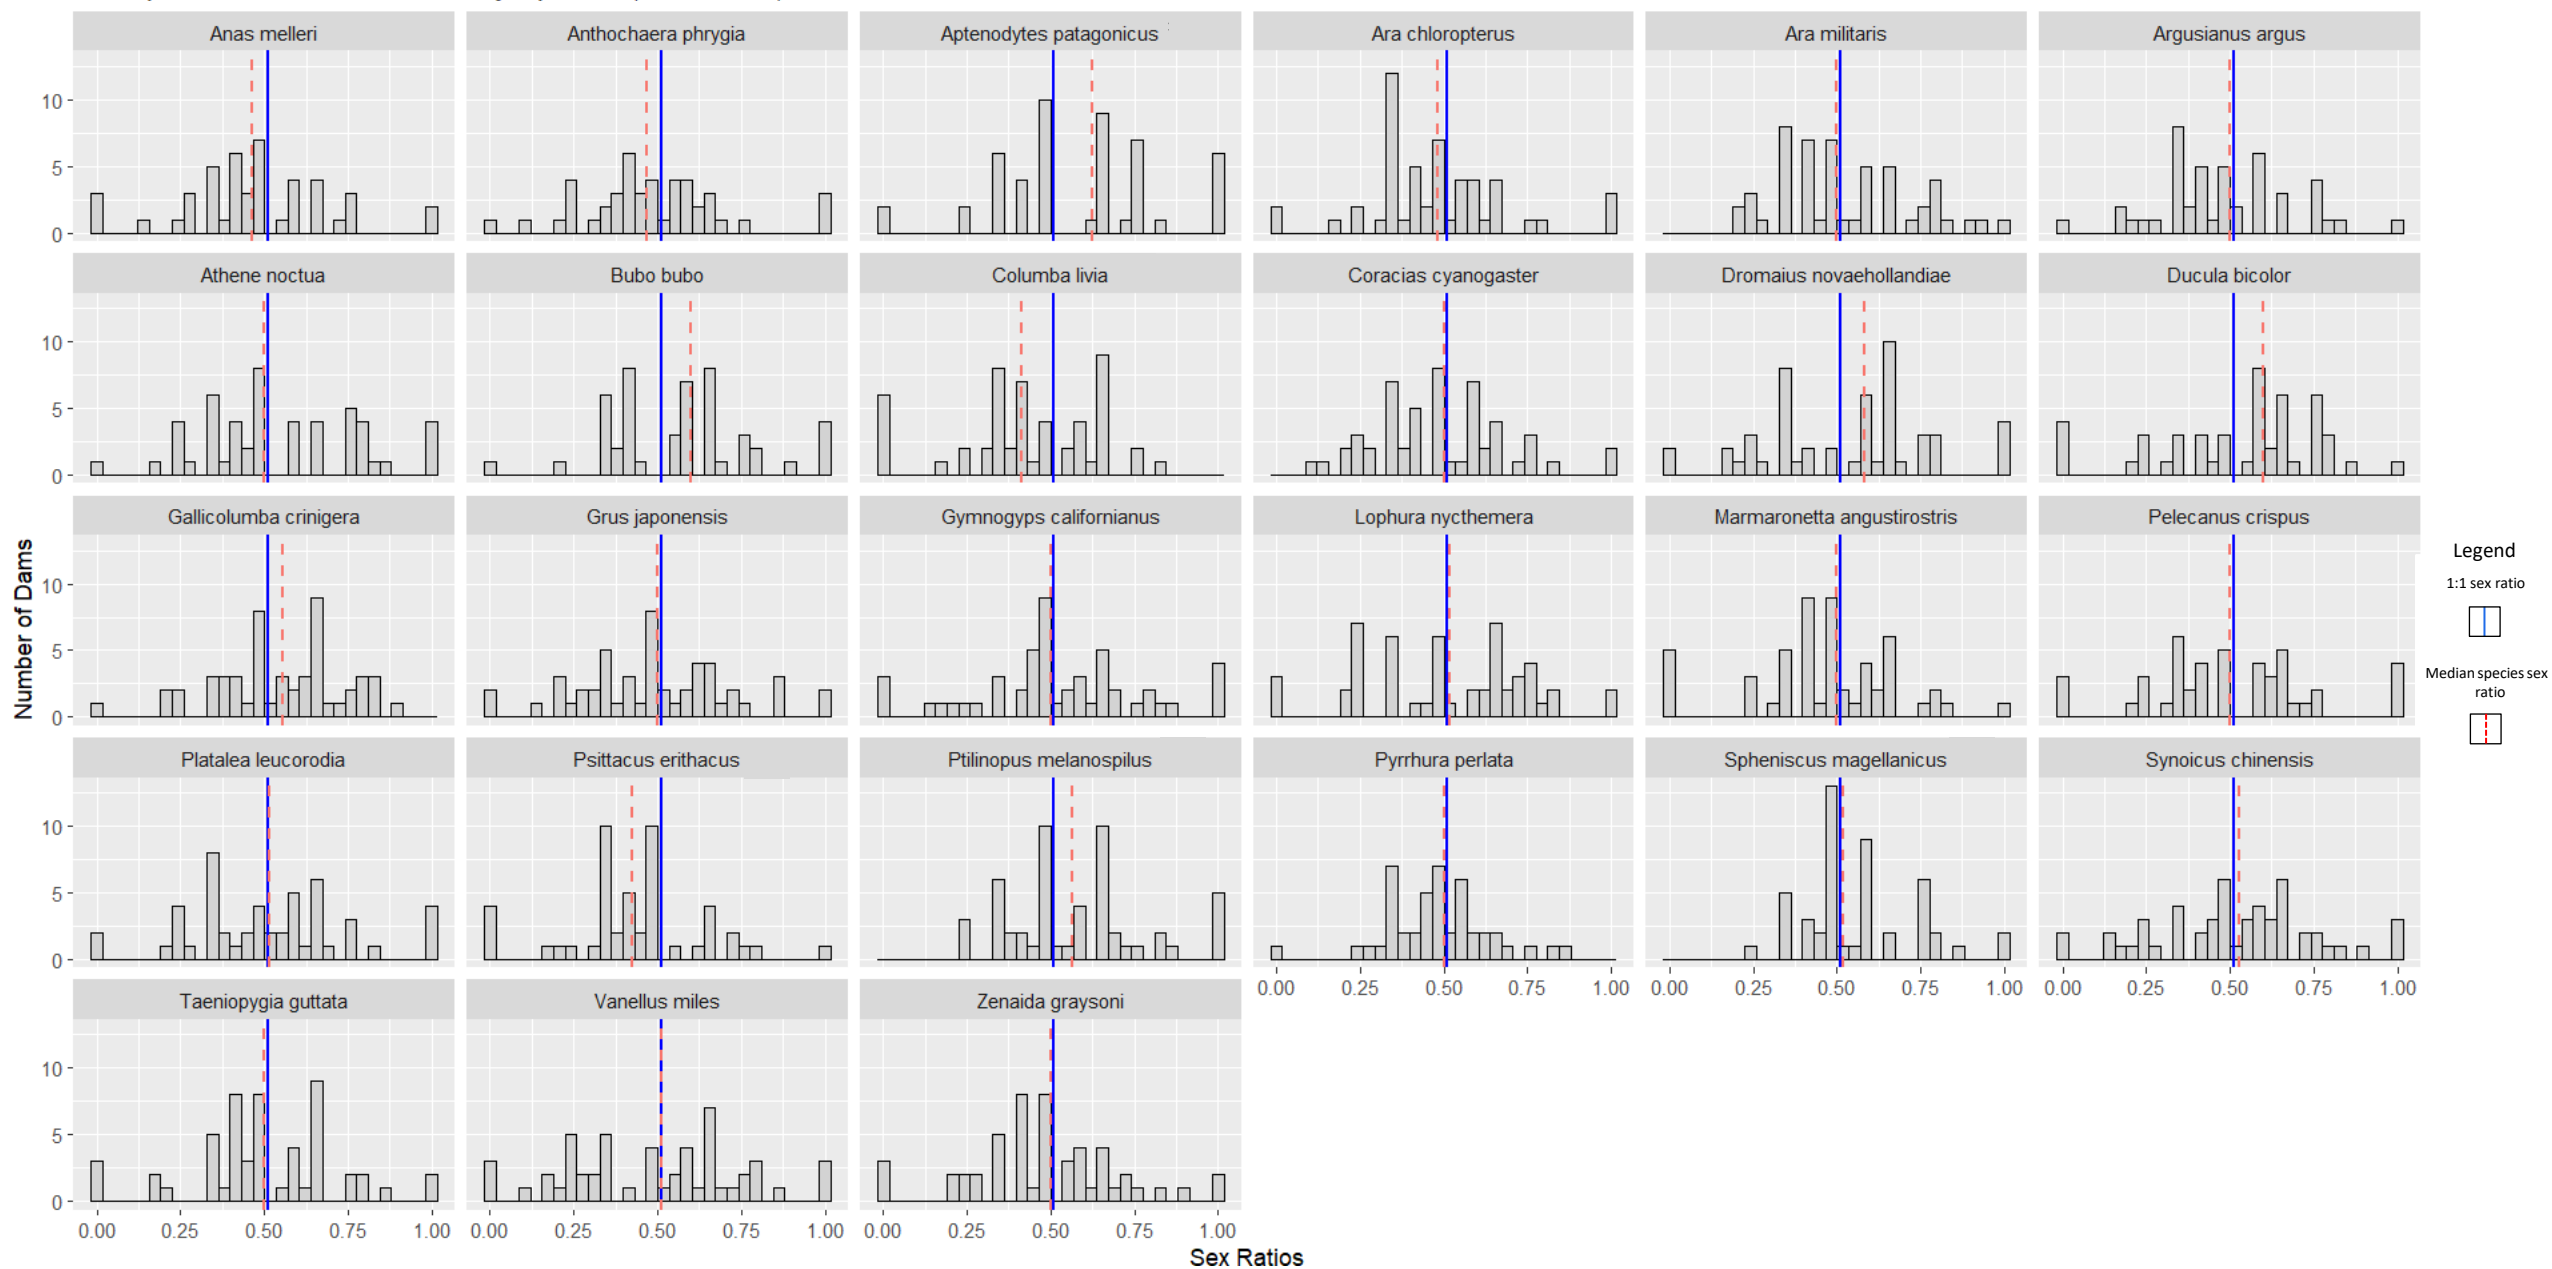

Time period 2 Dam Sex Ratios by Species (n = 54 - 75)

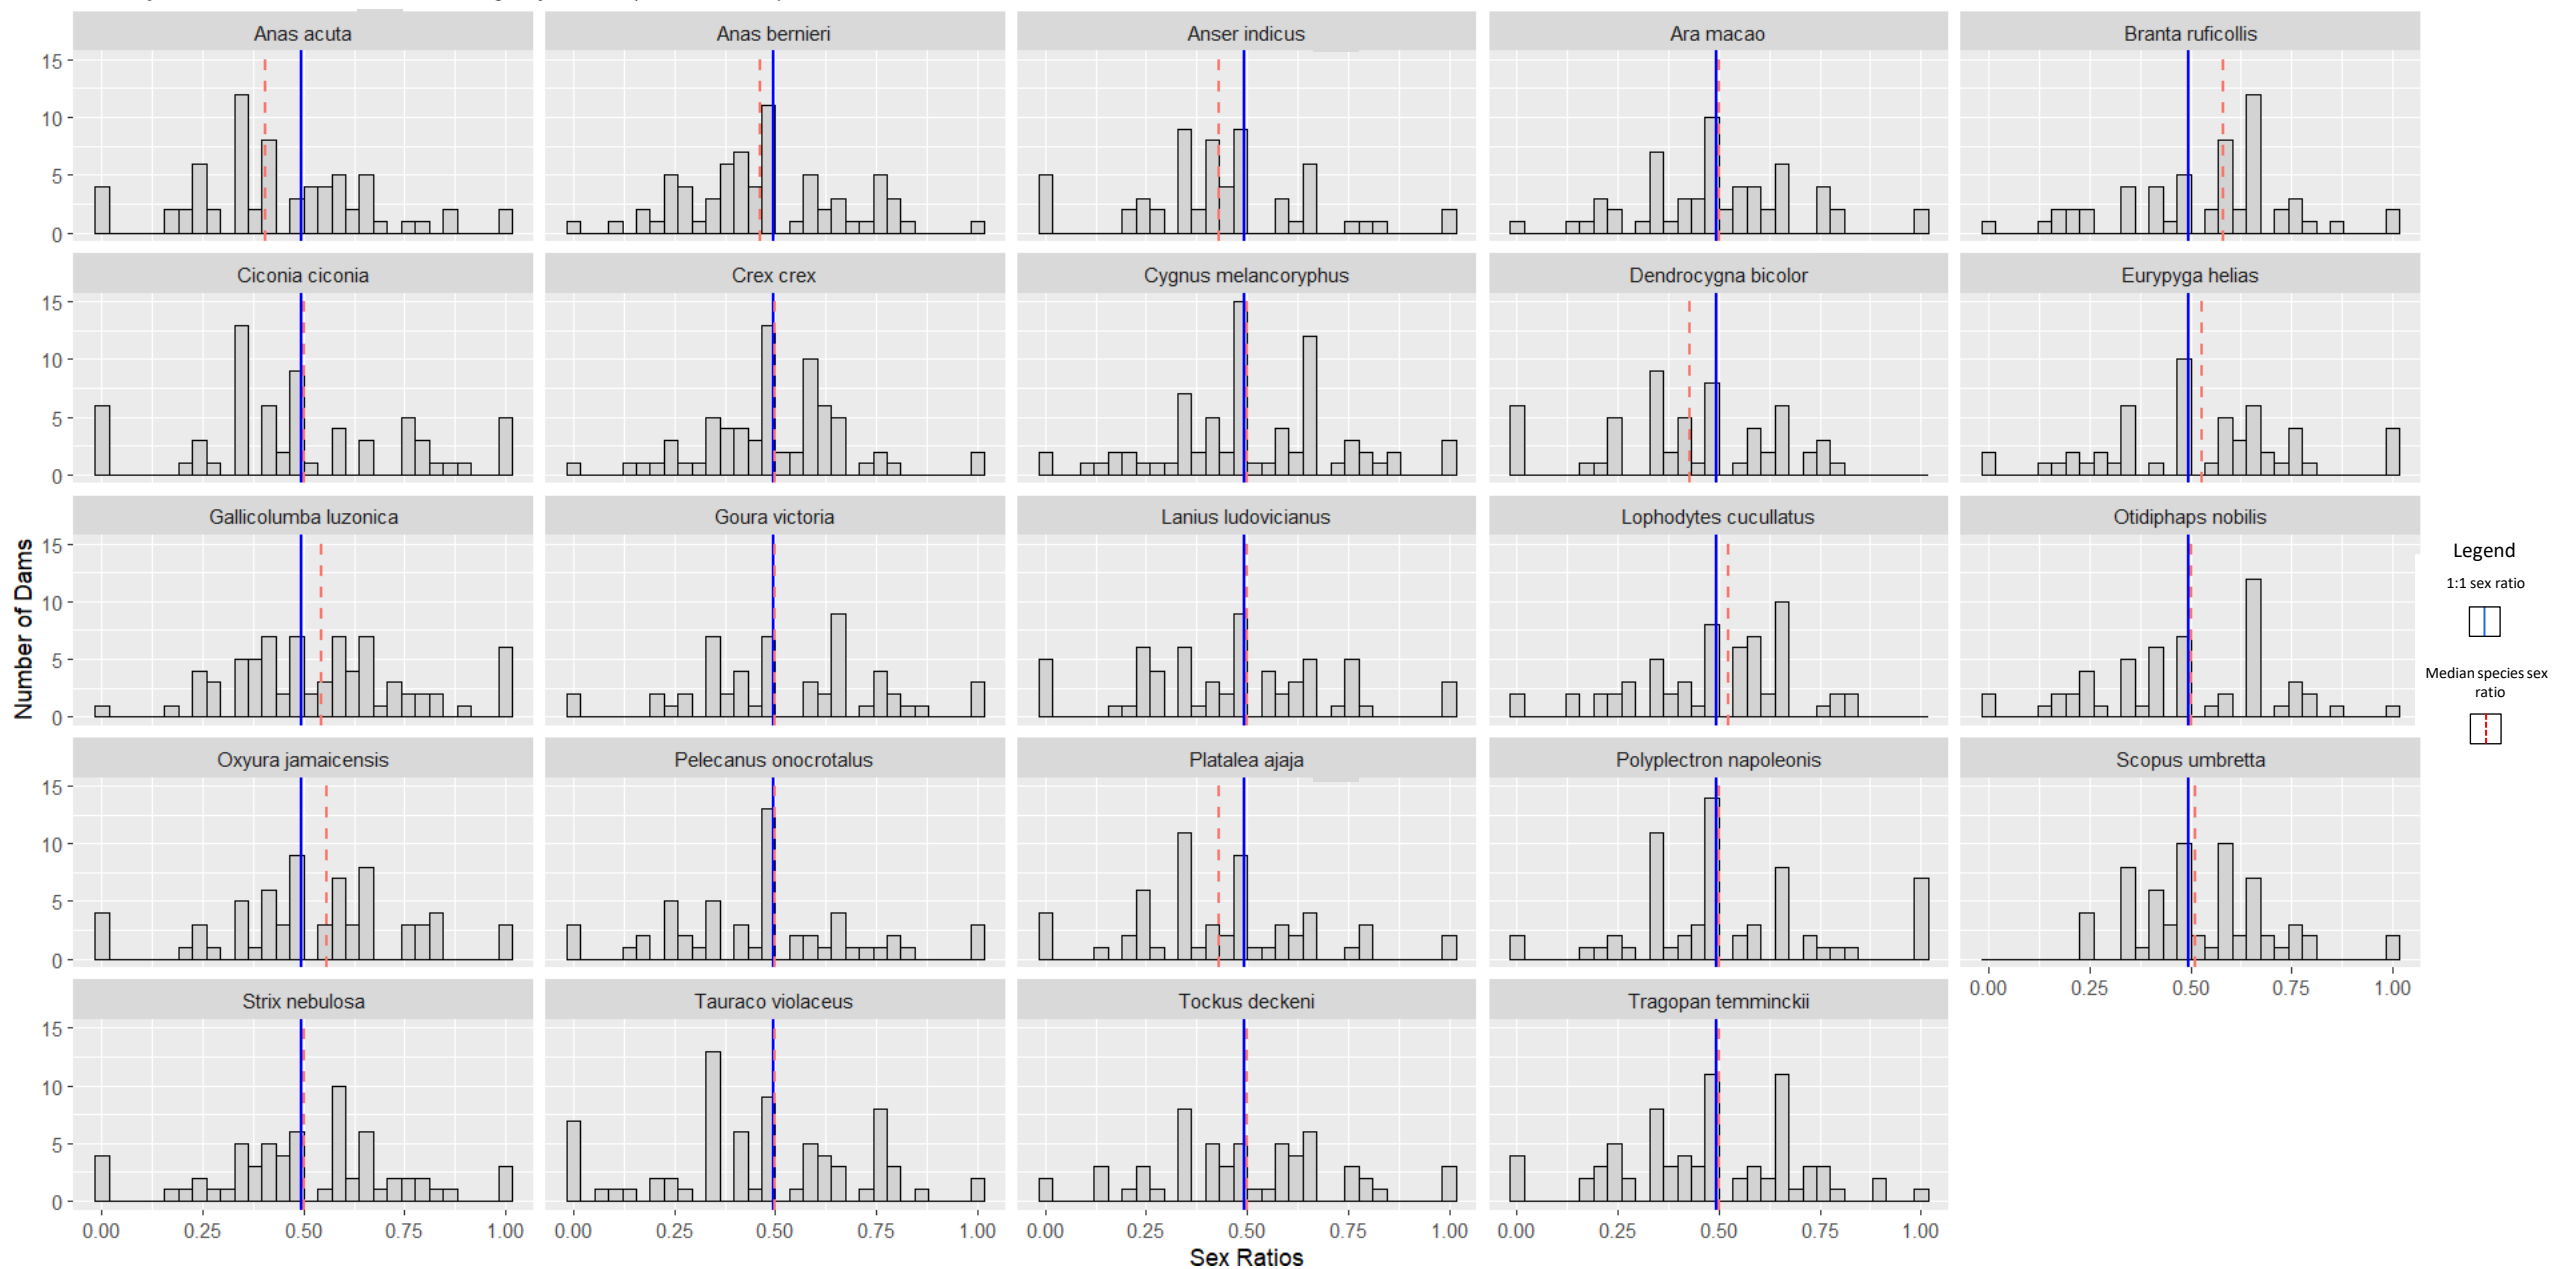

Time period 2 Dam Sex Ratios by Species (n = 76 - 125)

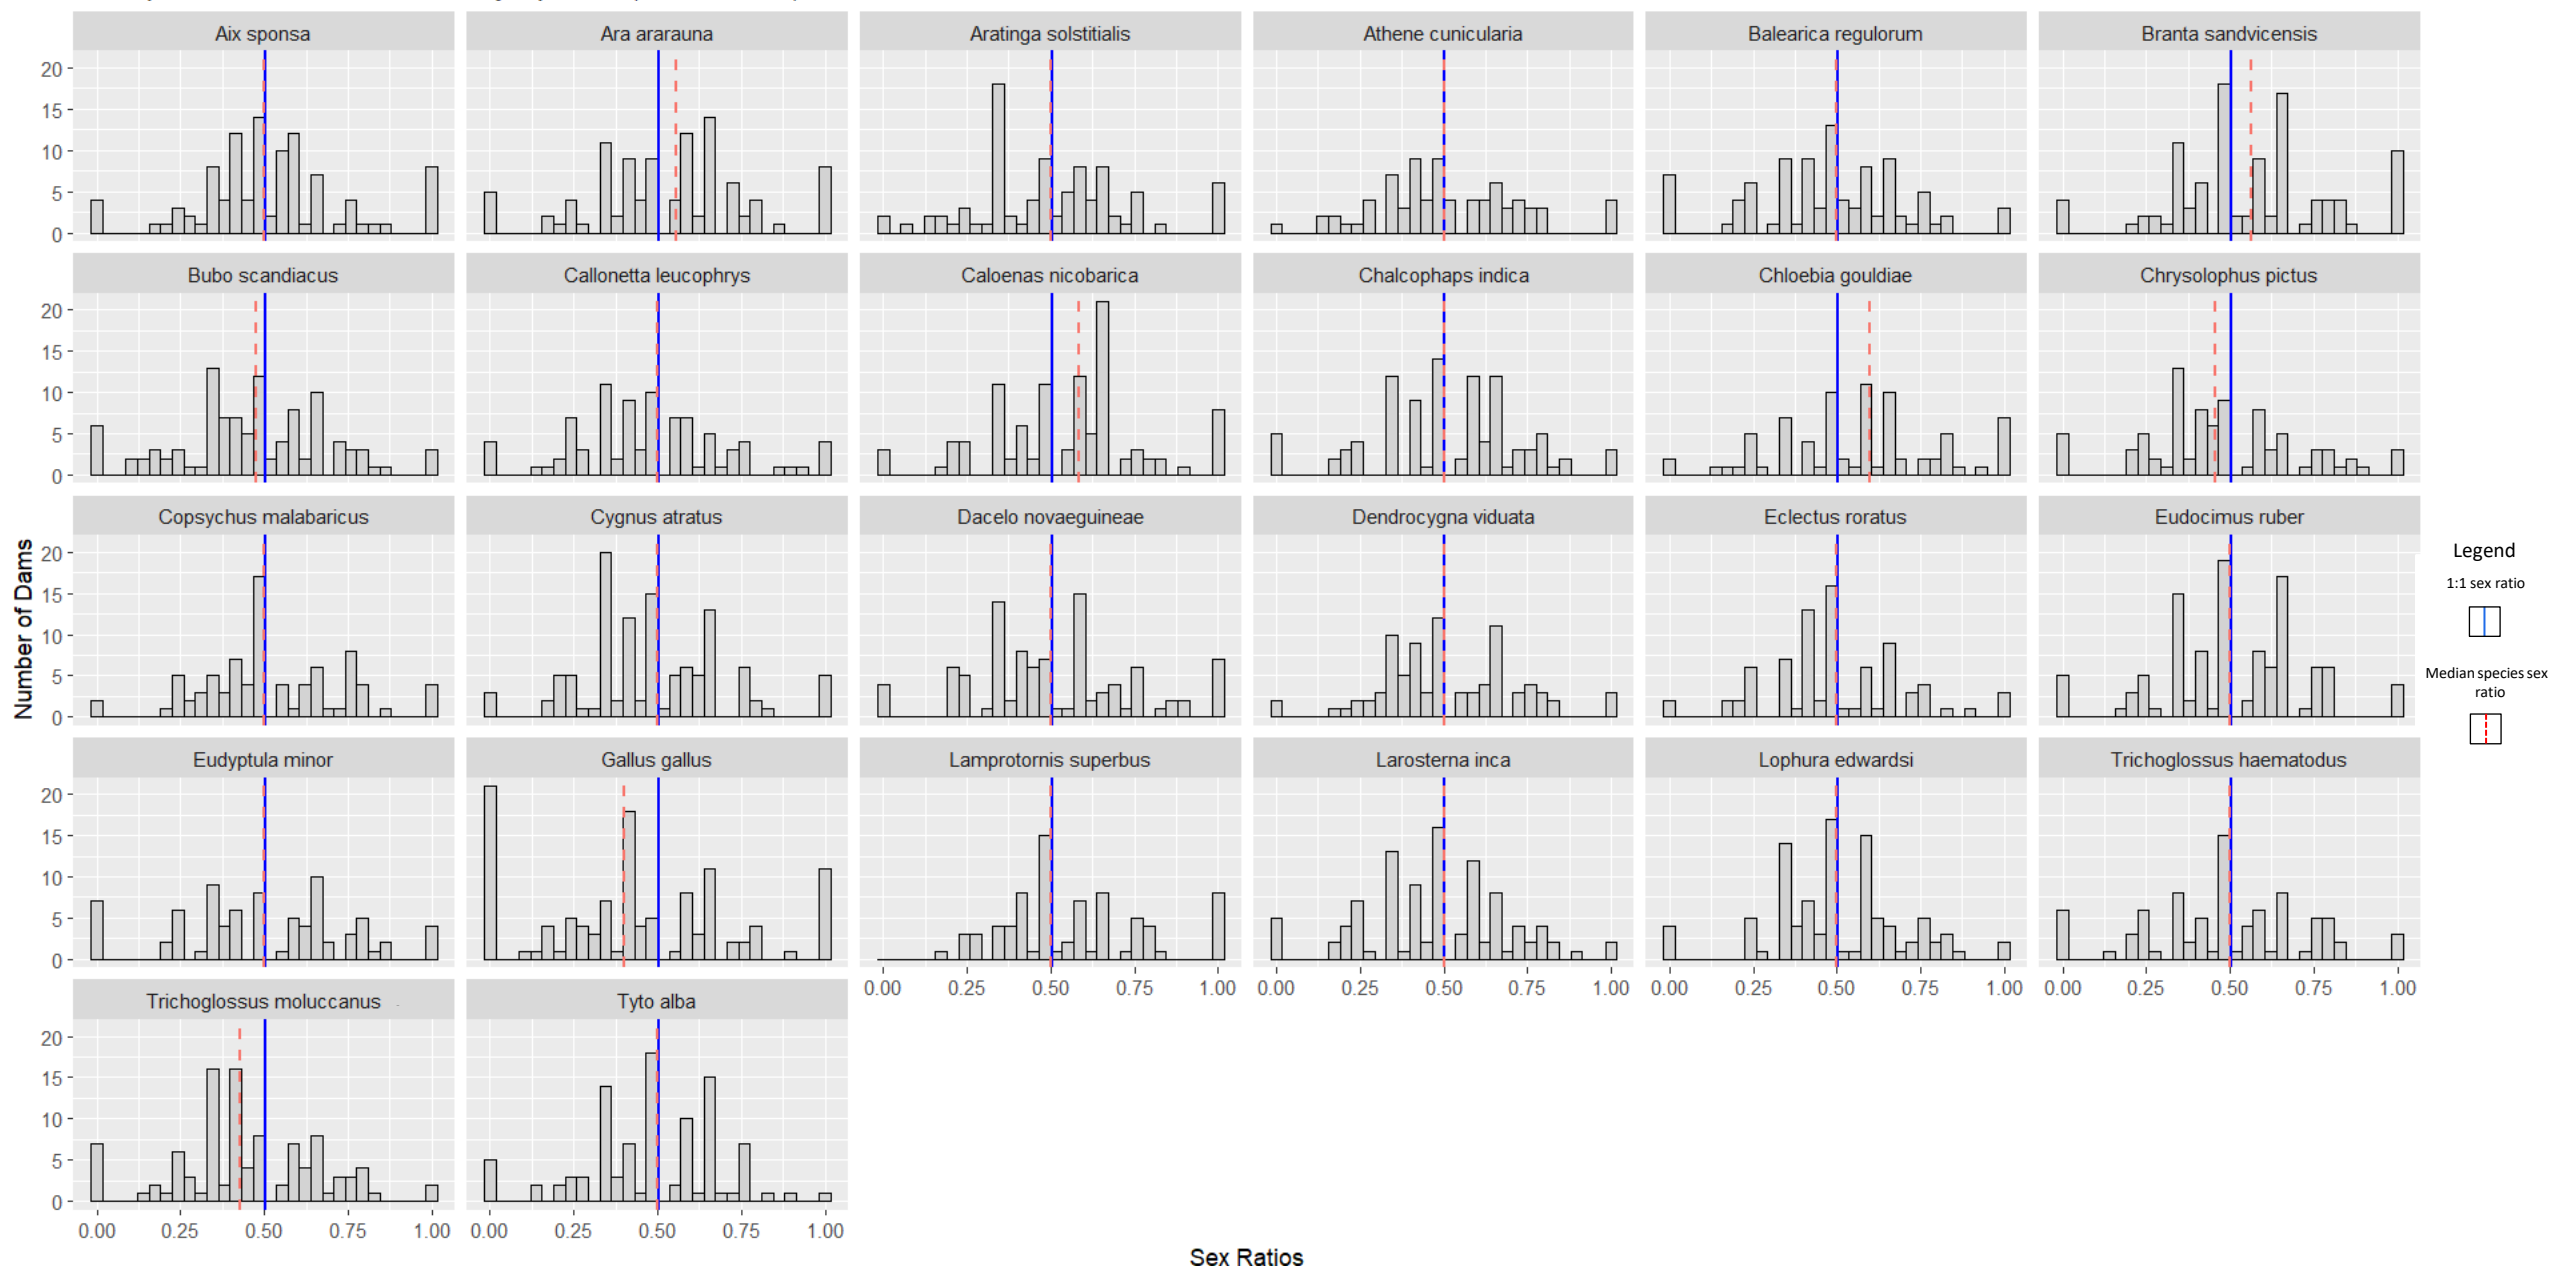

Time period 2 Dam Sex Ratios by Species (n > 125)

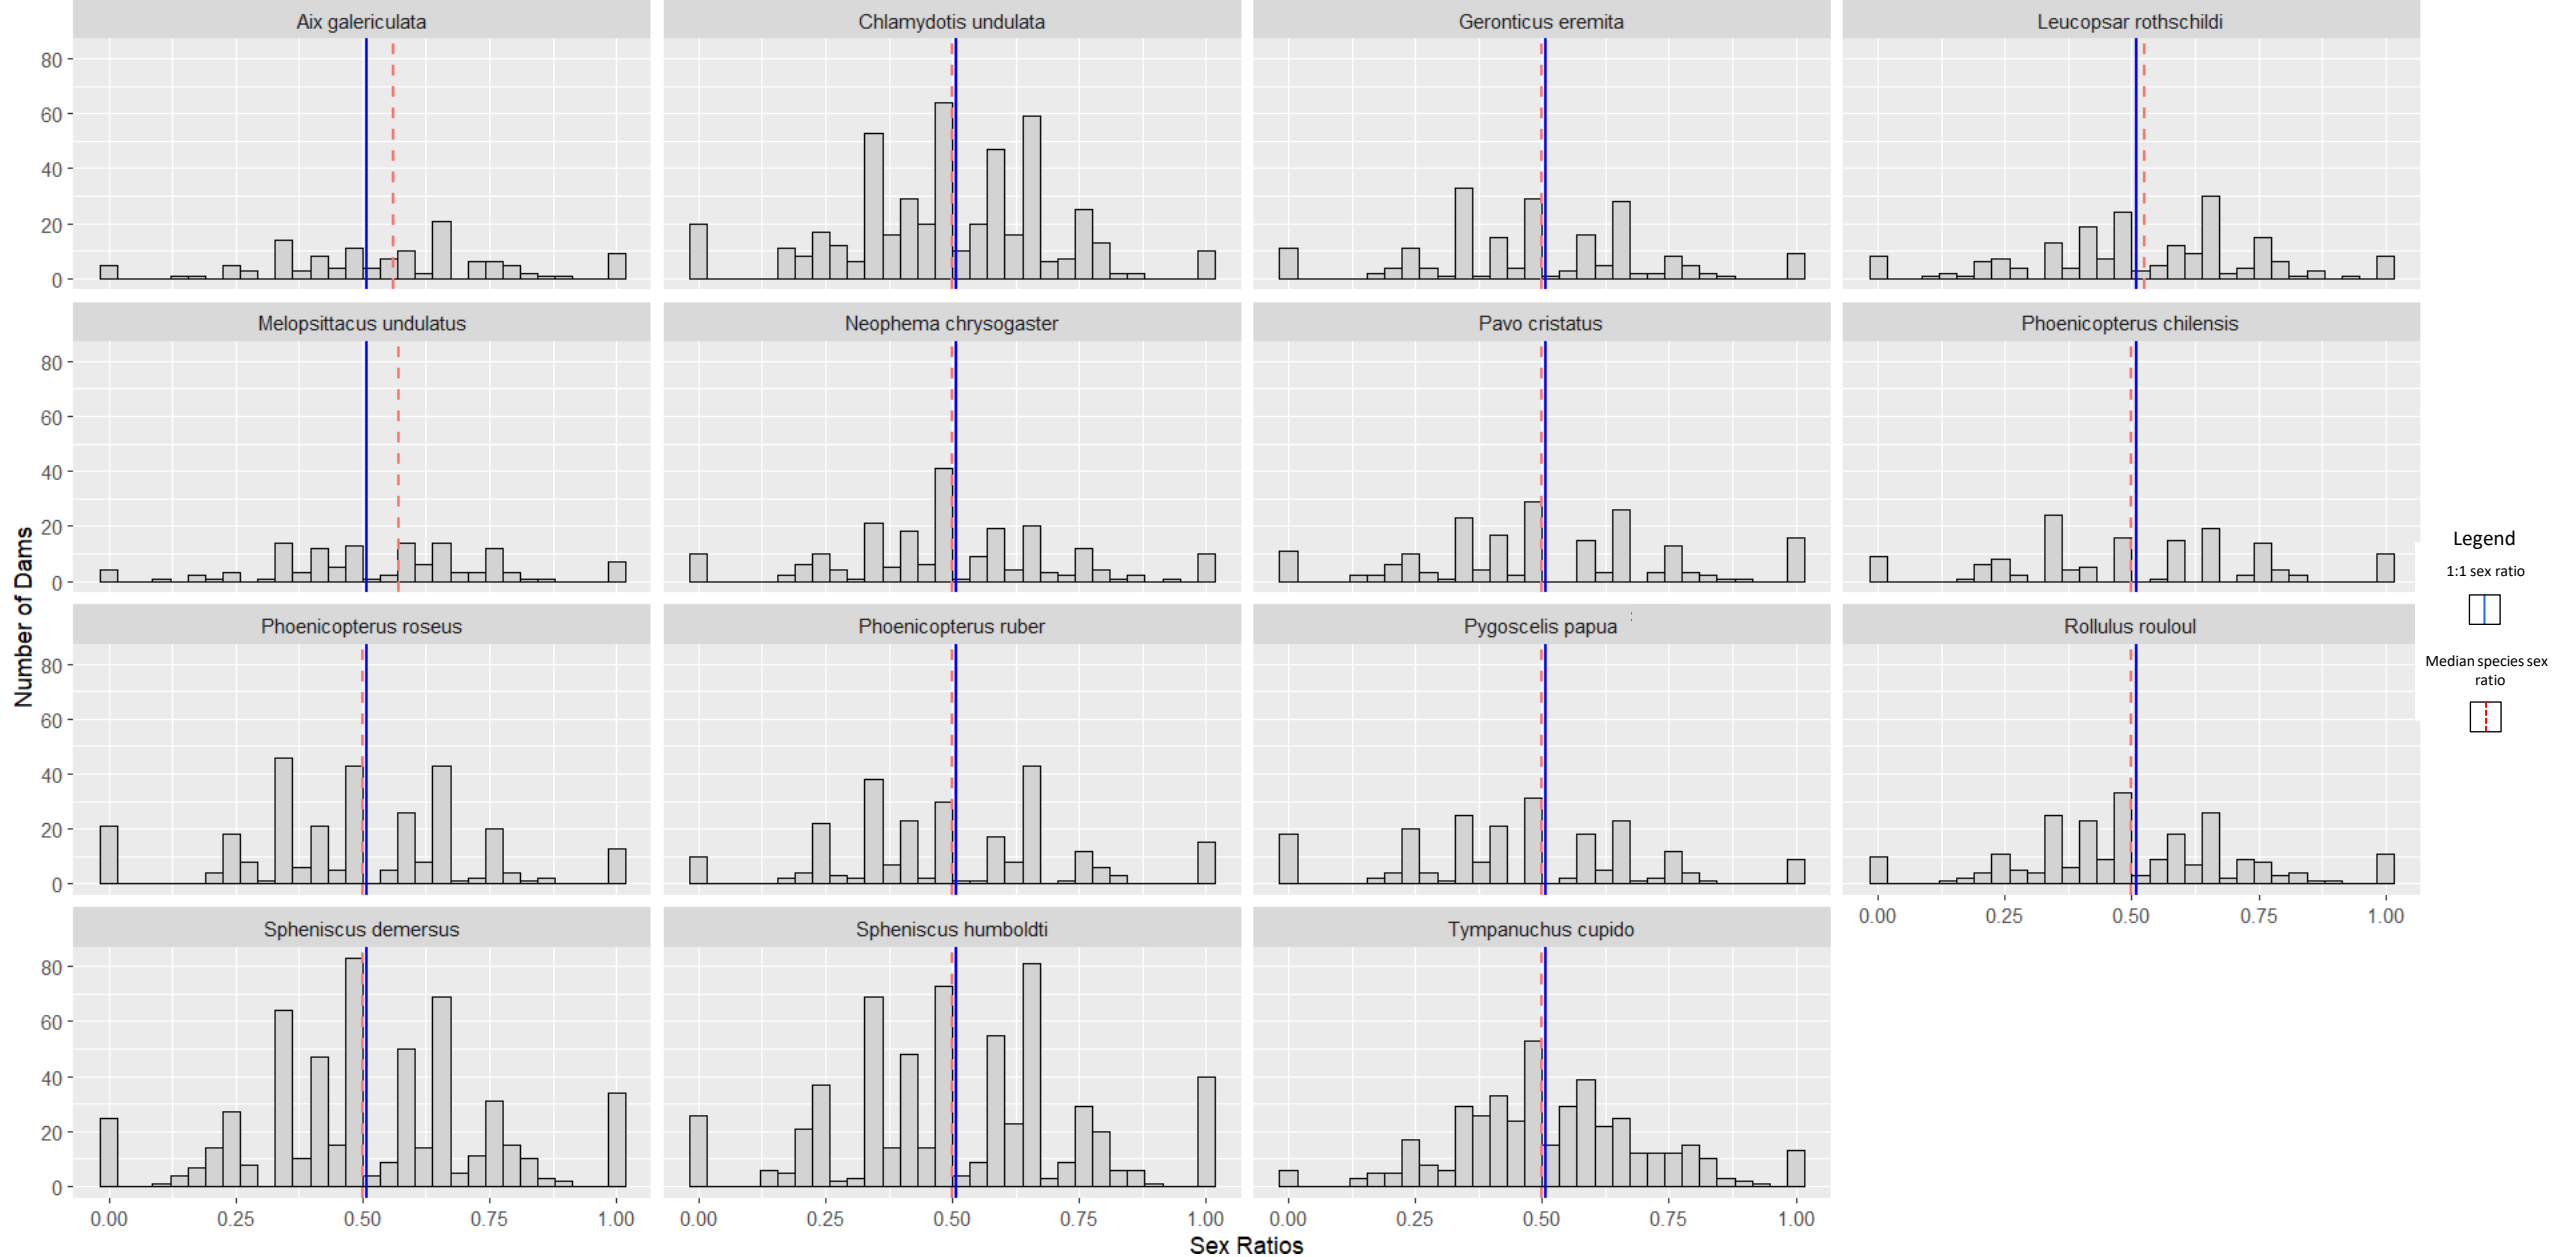

Supplement: s1 [file s1]
